# Supplementary material
Source: PubMed Central journal article supplement (PMC6583502)
Supplement: jama-319-1889-s001.pdf [file jama-319-1889-s001.pdf]

## Supplementary Online Content

McIntyre WF, Um KJ, et al. Vasopressin in addition to catecholaminergic vasopressors in the treatment of vasodilatory shock: a systematic review and meta-analysis. *JAMA*. doi:10.1001/jama.2018.4528

**eAppendix 1. MEDLINE Search Strategy**

**eAppendix 2. EMBASE Search Strategy**

**eAppendix 3. Cochrane CENTRAL Search Strategy**

**eAppendix 4. Basis for Outcome Selection**

**eAppendix 5. Outcome Importance for Choice of Vasopressor in Patients With Vasodilatory Shock**

**eAppendix 6. Characteristics of Included Studies**

**eAppendix 7. Characteristics of Important Excluded Studies**

**eAppendix 8. Characteristics of Ongoing Studies**

**eAppendix 9. Risk of Bias Graphs: Review Authors' Judgments About Each Risk of Bias Item Presented as Percentages Across All 23 Randomized Trials**

**eAppendix 10. Risk of Bias Summary: Review Authors' Judgments About Each Risk of Bias Item for Each Included Study**

**eAppendix 11. Forest Plots for All Outcomes, Including Sensitivity Analyses**

**eAppendix 12. Funnel Plots**

**eAppendix 13. Reported lengths of stay in primary studies and transformation of median and interquartile range to mean and standard deviation**

**eAppendix 14. Summary of Findings Table**

**eReferences.**

This supplementary material has been provided by the authors to give readers additional information about their work.

## eAppendix 1 – MEDLINE Search Strategy

Database: OVID Medline Epub Ahead of Print, In-Process & Other Non-Indexed Citations, Ovid MEDLINE(R) Daily and Ovid MEDLINE(R) 1946 to Feb 25 2018  
Search Strategy:

- 
- 1 exp shock/ or exp Sepsis Syndrome/ or exp Shock, Septic/ or exp Shock, Surgical/ or exp Shock, Traumatic/ or exp hypotension/ or exp Intensive Care/ (226606)
  - 2 (shock or sepsi\* or septi\* or vasoplegic shock or distributive shock or surgical shock or traumatic shock or anaphylactic shock or allergic shock or burn shock or vasodilatory shock).mp. (329552)
  - 3 ((circulatory adj6 failure) or (hypotension and (care adj5 (critical or intensive))))).mp. (5838)
  - 4 1 or 2 or 3 (442735)
  - 5 exp Vasopressins/ or exp Argipressin/ or exp Deamino Arginine Vasopressin/ or exp Lypressin/ or exp Felypressin/ or exp Ornipressin/ or exp Terlipressin/ (34972)
  - 6 (Vasopressin\* or Argipressin or Desmopressin or Lypressin or Felypressin or Ornipressin or Terlipressin or Glypressin or Pituitrin).mp. (46770)
  - 7 5 or 6 (46770)
  - 8 exp Epinephrine/ or exp Norepinephrine/ or exp Catecholamines/ or exp Orciprenaline/ or exp dobutamine/ or exp dopamine/ (248859)
  - 9 (Epinephrin\* or Norepinephrin\* or Catecholamin\* or Orciprenalin\* or dobutamin\* or dopamin\* or adrenalin\* or noradrenalin\*).mp. (345736)
  - 10 8 or 9 (385350)
  - 11 4 and 7 and 10 (872)
  - 12 (randomized controlled trial or controlled clinical trial).pt. or clinical trials as topic.sh. or random allocation.sh. or double-blind method.sh. or single-blind method.sh. or clinical trial.pt. or explode clinical trials as topic.mp. or (clinic: adj25 trial:).ti,ab. or ((singl: or doubl: or trebl: or tripl:) adj25 (blind: or mask:)).ti,ab. or placebos.sh. or placebo:.ti,ab. or random:.ti,ab. or research design.sh. or comparative study.sh. or explode evaluation studies.mp. or follow-up studies.sh. or prospective studies.sh. or (control: or prospectiv: or volunteer:).ti,ab. or cross-over studies.sh. or latin square:.tw. [mp=title, abstract, original title, name of substance word, subject heading word, keyword heading word, protocol supplementary concept word, rare disease supplementary concept word, unique identifier, synonyms] (6554473)
  - 13 (animals not humans).sh. (4396188)
  - 14 12 not 13 (5375354)
  - 15 11 and 14 (314)

\*\*\*\*\*

## eAppendix 2 – EMBASE search strategy

Database(s): EMBASE 1980 to 2018 Week 09

Search Strategy:

| #  | Searches                                                                                                                                                                                                                                                                               | Results |
|----|----------------------------------------------------------------------------------------------------------------------------------------------------------------------------------------------------------------------------------------------------------------------------------------|---------|
| 1  | exp Septic Shock/ or exp Shock/ or exp Sepsis/ or exp Traumatic Shock/ or exp Hypotension/ or exp Intensive Care/                                                                                                                                                                      | 930538  |
| 2  | (shock or sepsi* or septi* or vasoplegic shock or distributive shock or surgical shock or traumatic shock or anaphylactic shock or allergic shock or burn shock or vasodilatory shock or ((circulatory adj6 failure) or (hypotension and (care adj5 (critical or intensive))))).ti,ab. | 342788  |
| 3  | 1 or 2                                                                                                                                                                                                                                                                                 | 1090977 |
| 4  | Vasopressin Derivative/ or Argipressin/ or Lypressin/ or Felypressin/ or Ornipressin/ or Terlipressin/                                                                                                                                                                                 | 22557   |
| 5  | (Vasopressin* or Argipressin or Desmopressin or Lypressin or Felypressin or Ornipressin or Terlipressin or Glypressin or Pituitrin).ti,ab.                                                                                                                                             | 38774   |
| 6  | 4 or 5                                                                                                                                                                                                                                                                                 | 47953   |
| 7  | exp Adrenalin/ or exp Noradrenalin/ or exp Norepinephrine/ or exp Epinephrine/ or exp Catecholamine/ or exp Orciprenaline/ or exp Dobutamine/ or exp Dopamine/                                                                                                                         | 288424  |
| 8  | (Epinephrin* or Norepinephrin* or Catecholamin* or Orciprenalin* or dobutamin* or dopamin* or adrenalin* or noradrenalin*).ti,ab.                                                                                                                                                      | 320276  |
| 9  | 7 or 8                                                                                                                                                                                                                                                                                 | 440462  |
| 10 | 3 and 6 and 9                                                                                                                                                                                                                                                                          | 2181    |
| 11 | (controlled study.ab. or random*.ti,ab. or trial*.ti,ab.) and human*.ec,hw,fs.                                                                                                                                                                                                         | 1565407 |
| 12 | random:.tw. or clinical trial:.mp. or exp health care quality/                                                                                                                                                                                                                         | 4439121 |
| 13 | 11 or 12                                                                                                                                                                                                                                                                               | 4614283 |
| 14 | 10 and 13                                                                                                                                                                                                                                                                              | 1006    |

### eAppendix 3 – Cochrane CENTRAL search strategy

Date Run: 25/02/18 19:48:43.175

Description:

| ID  | Search                                                                                                                                                                               | Hits  |
|-----|--------------------------------------------------------------------------------------------------------------------------------------------------------------------------------------|-------|
| #1  | MeSH descriptor: [Shock] explode all trees                                                                                                                                           | 1638  |
| #2  | MeSH descriptor: [Systemic Inflammatory Response Syndrome] explode all trees                                                                                                         | 3970  |
| #3  | MeSH descriptor: [Shock, Septic] explode all trees                                                                                                                                   | 565   |
| #4  | MeSH descriptor: [Shock, Surgical] explode all trees                                                                                                                                 | 8     |
| #5  | MeSH descriptor: [Shock, Traumatic] explode all trees                                                                                                                                | 51    |
| #6  | MeSH descriptor: [Hypotension] explode all trees                                                                                                                                     | 1705  |
| #7  | MeSH descriptor: [Vasoplegia] explode all trees                                                                                                                                      | 3     |
| #8  | MeSH descriptor: [Critical Care] explode all trees                                                                                                                                   | 2219  |
| #9  | circulatory near failure:ti,ab,kw (Word variations have been searched)                                                                                                               | 95    |
| #10 | shock or sepsi* or septi* or vasoplegic shock or distributive shock or surgical shock or traumatic shock or anaphylactic shock or allergic shock or burn shock or vasodilatory shock | 16646 |
| #11 | hypotension and ((critical near care) or (intensive near care))                                                                                                                      | 1623  |
| #12 | #1 or #2 or #3 or #4 or #5 or #6 or #7 or #8 or #9 or #10 or #11                                                                                                                     | 22957 |
| #13 | MeSH descriptor: [Vasopressins] explode all trees                                                                                                                                    | 1178  |
| #14 | MeSH descriptor: [Arginine Vasopressin] explode all trees                                                                                                                            | 622   |
| #15 | MeSH descriptor: [Deamino Arginine Vasopressin] explode all trees                                                                                                                    | 343   |
| #16 | MeSH descriptor: [Lypressin] explode all trees                                                                                                                                       | 170   |
| #17 | MeSH descriptor: [Felypressin] explode all trees                                                                                                                                     | 24    |
| #18 | MeSH descriptor: [Ornipressin] explode all trees                                                                                                                                     | 13    |
| #19 | Vasopressin* or argipressin or desmopressin or lypressin or felypressin or ornipressin or terlipressin or glypressin or pituitrin                                                    | 2716  |
| #20 | #13 or #14 or #15 or #16 or #17 or #18 or #19                                                                                                                                        | 2716  |
| #21 | MeSH descriptor: [Epinephrine] explode all trees                                                                                                                                     | 4147  |
| #22 | MeSH descriptor: [Norepinephrine] explode all trees                                                                                                                                  | 2543  |
| #23 | MeSH descriptor: [Catecholamines] explode all trees                                                                                                                                  | 9170  |
| #24 | MeSH descriptor: [Dobutamine] explode all trees                                                                                                                                      | 497   |
| #25 | MeSH descriptor: [Dopamine] explode all trees                                                                                                                                        | 1119  |
| #26 | epinephrin* or norepinephrin* or catecholamin* or dobutamin* or dopamin* or adrenalin* or noradrenalin*                                                                              | 21551 |
| #27 | #21 or #22 or #23 or #24 or #25 or #26                                                                                                                                               | 23700 |
| #28 | #12 and #20 and #27                                                                                                                                                                  | 185   |

## **eAppendix 4 – Basis for Outcome Selection**

A number of different outcomes are important for patients with vasodilatory shock. The Core Outcome Measures in Effectiveness Trials Initiative database contains a single article reporting on core outcome sets in patients with shock.<sup>1</sup>

This publication from the International Sepsis Forum acknowledges the heterogeneous clinical populations and recommends that studies choose outcome measures that reflect the underlying physiology. Thus, in addition to mortality, length of stay and general quality of life, this review includes specific indicators of organ injury, all of which can result in significant functional impairment and disability and are generally considered to be patient-important.<sup>2</sup>

Outcome importance scores were derived from a convenience sample of 5 physicians, 2 physicians' assistants, 5 nurses and 4 patients. Mortality, stroke, myocardial injury, requirement for renal replacement therapy, limb ischemia and ICU length of stay were rated as "critically important". Ventricular arrhythmia, length of hospital stay and atrial fibrillation were rated as "important".

### **Outcome importance Scores**

We evaluated the importance of each outcome as per GRADE with scores 1-3 meaning not important, 4-6 meaning important and 7-9 meaning critically important. Importance scores were obtained by polling a convenience sample of patients and healthcare providers in three intensive care units (2 medical-surgical and one post-cardiac surgery) at a large, academic tertiary hospital.

**eAppendix 5 – Outcome Importance for Choice of Vasopressor in Patients with Vasodilatory Shock**

|                                                  | <b>Mean</b> | <b>Standard Deviation</b> |
|--------------------------------------------------|-------------|---------------------------|
| <b>Mortality (28 days)</b>                       | <b>9</b>    | <b>1</b>                  |
| <b>Stroke</b>                                    | <b>8</b>    | <b>2</b>                  |
| <b>Myocardial Injury</b>                         | <b>7</b>    | <b>2</b>                  |
| <b>Requirement for Renal Replacement Therapy</b> | <b>7</b>    | <b>1</b>                  |
| <b>Limb Ischemia</b>                             | <b>7</b>    | <b>2</b>                  |
| <b>ICU LOS</b>                                   | <b>7</b>    | <b>2</b>                  |
| <b>Ventricular Arrhythmia</b>                    | <b>6</b>    | <b>2</b>                  |
| <b>Atrial Fibrillation</b>                       | <b>6</b>    | <b>2</b>                  |
| <b>Hospital LOS</b>                              | <b>6</b>    | <b>2</b>                  |

*9 = Critically Important, 1 = Not Important*  
*Respondents: ICU Physicians (3), Non-ICU Physicians (2), ICU Physicians Assistants (2), ICU Nurses (5), Patients (4)*

**ICU = Intensive Care Unit; LOS = Length of Stay**

**Assessed with an in-person survey at Hamilton General Hospital in March**

**2017**

**Respondents:**

*ICU Physicians (3)*

*ICU Physicians' Assistants (2)*

*ICU Nurses (5)*

*Patients (4)*

## eAppendix 6 – Characteristics of Included Studies

### Abdullah 2012<sup>3</sup>

|                                                                                                               |                                                                                                                                                                                               |                                                                  |
|---------------------------------------------------------------------------------------------------------------|-----------------------------------------------------------------------------------------------------------------------------------------------------------------------------------------------|------------------------------------------------------------------|
| Methods                                                                                                       | Single-centre open-label randomized controlled study at a tertiary care university hospital in Egypt                                                                                          |                                                                  |
| Participants                                                                                                  | Adult patients with paracentesis-induced vasodilatory shock and end-stage liver disease<br>Mean age = 59 years, 74% male, Childs C score = 62% (N=34)                                         |                                                                  |
| Interventions                                                                                                 | Terlipressin 1 mg over 30 minutes then continuous infusion of 2mcg/kg/h, titrated up, weaned within 24 h<br>Versus Norepinephrine starting at 0.1 mcg/kg/min, titrated up, weaned within 24 h |                                                                  |
| Open-label Catecholamines Permitted                                                                           | Yes                                                                                                                                                                                           |                                                                  |
| Outcomes Reported in Manuscript                                                                               | Atrial fibrillation, myocardial injury (e.g. altered ST segments), ventricular arrhythmia, acute kidney injury (numbers provided for only one group).                                         |                                                                  |
| Outcomes Clarified by Contacting Authors                                                                      | Authors contacted. No reply received.                                                                                                                                                         |                                                                  |
| Potential Conflicts                                                                                           | No funding source. Declarations of interest: not stated.                                                                                                                                      |                                                                  |
| Notes                                                                                                         | N/A                                                                                                                                                                                           |                                                                  |
| <b>Risk of bias</b>                                                                                           |                                                                                                                                                                                               |                                                                  |
| <i>Bias domain</i>                                                                                            | <i>Authors' judgement</i>                                                                                                                                                                     | <i>Support for judgement</i>                                     |
| Random sequence generation (selection bias)                                                                   | Likely low risk of bias                                                                                                                                                                       | Described as randomized but method not mentioned                 |
| Allocation concealment (selection bias)                                                                       | Likely low risk of bias                                                                                                                                                                       | Randomized through closed envelopes, no specification of opacity |
| Blinding of participants and personnel (performance bias)                                                     | High risk of bias                                                                                                                                                                             | Not blinded                                                      |
| Blinding of outcome assessment (detection bias)<br><i>AF, RRT, digital ischemia, myocardial injury and VT</i> | High risk of bias                                                                                                                                                                             | Not blinded                                                      |
| Blinding of outcome assessment (detection bias)<br><i>Mortality, Stroke, LOS</i>                              | Low risk of bias                                                                                                                                                                              | Not blinded, but objective outcomes                              |
| Incomplete outcome data (attrition bias)<br><i>All outcomes</i>                                               | Low risk of bias                                                                                                                                                                              | No loss of data after randomization                              |
| Selective reporting (reporting bias)<br><i>All outcomes</i>                                                   | Likely low risk of bias                                                                                                                                                                       | All primary outcomes reported, protocol mentioned                |
| Other bias                                                                                                    | Low risk of bias                                                                                                                                                                              | None detected                                                    |

**Acevedo 2009<sup>4</sup>**

|                                                                                                               |                                                                                                      |                                                                                                                                                  |
|---------------------------------------------------------------------------------------------------------------|------------------------------------------------------------------------------------------------------|--------------------------------------------------------------------------------------------------------------------------------------------------|
| Methods                                                                                                       | Single-centre open-label randomized controlled study at a tertiary care university hospital in Spain |                                                                                                                                                  |
| Participants                                                                                                  | Adult participants with cirrhosis and septic shock (N=24)                                            |                                                                                                                                                  |
| Interventions                                                                                                 | Terlipressin 1-2mg/4h<br>versus<br>Adrenergic drugs as needed                                        |                                                                                                                                                  |
| Open-label<br>Catecholamines Permitted                                                                        | Yes                                                                                                  |                                                                                                                                                  |
| Outcomes Reported in Abstract                                                                                 | Mortality (ICU, in-hospital), acute kidney injury, and other non-specified adverse events            |                                                                                                                                                  |
| Outcomes Clarified by Contacting Authors                                                                      | Authors contacted. No reply received.                                                                |                                                                                                                                                  |
| Potential Conflicts                                                                                           | No funding source stated. Declarations of interest: not stated.                                      |                                                                                                                                                  |
| Notes                                                                                                         | Abstract only.                                                                                       |                                                                                                                                                  |
| <b>Risk of bias</b>                                                                                           |                                                                                                      |                                                                                                                                                  |
| <i>Bias domain</i>                                                                                            | <i>Authors' judgement</i>                                                                            | <i>Support for judgement</i>                                                                                                                     |
| Random sequence generation (selection bias)                                                                   | Likely low risk of bias                                                                              | Described as randomized but method not mentioned                                                                                                 |
| Allocation concealment (selection bias)                                                                       | Likely high risk of bias                                                                             | No description of concealment, no registered protocol, no previous publications by research team upon which to judge prior methodological rigour |
| Blinding of participants and personnel (performance bias)                                                     | High risk of bias                                                                                    | Open-label                                                                                                                                       |
| Blinding of outcome assessment (detection bias)<br><i>AF, RRT, digital ischemia, myocardial injury and VT</i> | High risk of bias                                                                                    | Not blinded                                                                                                                                      |
| Blinding of outcome assessment (detection bias)<br><i>Mortality, Stroke, LOS</i>                              | Low risk of bias                                                                                     | Not blinded, but objective outcomes                                                                                                              |
| Incomplete outcome data (attrition bias)<br><i>All outcomes</i>                                               | Likely low risk of bias                                                                              | Not specified whether or not exclusion happened after randomization, but very short follow-up                                                    |
| Selective reporting (reporting bias)<br><i>All outcomes</i>                                                   | Likely low risk of bias                                                                              | No protocol, but expected outcomes                                                                                                               |
| Other bias                                                                                                    | High risk of bias                                                                                    | Published only as abstract                                                                                                                       |



## Albanese 2005<sup>5</sup>

|                                                                                                               |                                                                                                                                                                                                                                                                  |                                                                                        |
|---------------------------------------------------------------------------------------------------------------|------------------------------------------------------------------------------------------------------------------------------------------------------------------------------------------------------------------------------------------------------------------|----------------------------------------------------------------------------------------|
| Methods                                                                                                       | Single-centre open-label randomized controlled study at a tertiary care university hospital in France                                                                                                                                                            |                                                                                        |
| Participants                                                                                                  | Adult participants with septic shock and two or more organ dysfunctions<br>Mean age = 66 years, 65% male, 70% lung infection, APACHE II score = 28.5 (N = 20)                                                                                                    |                                                                                        |
| Interventions                                                                                                 | Terlipressin 1 mg bolus, followed by second bolus 1 mg if MAP <65 mm Hg<br>versus<br>Norepinephrine started with 0.3 mcg/kg and increased by 0.3 mcg/kg every 4 minutes until MAP 65 to 75 mm Hg                                                                 |                                                                                        |
| Open-label Catecholamines Permitted                                                                           | Yes                                                                                                                                                                                                                                                              |                                                                                        |
| Outcomes Reported in Manuscript                                                                               | In-hospital mortality, renal function (urine flow, creatinine clearance up to 8 hours [presented on a graph only, no numbers provided], hemodynamic parameters, blood gas, lactate at 6 hours. For the mortality analysis, we used data on in-hospital mortality |                                                                                        |
| Outcomes Clarified by Contacting Authors                                                                      | Authors indicated that no further data was available.                                                                                                                                                                                                            |                                                                                        |
| Potential Conflicts                                                                                           | No funding source. Declarations of interest: none.                                                                                                                                                                                                               |                                                                                        |
| Notes                                                                                                         | Unpublished information made available from authors.                                                                                                                                                                                                             |                                                                                        |
| <b>Risk of bias</b>                                                                                           |                                                                                                                                                                                                                                                                  |                                                                                        |
| <i>Bias domain</i>                                                                                            | <i>Authors' judgement</i>                                                                                                                                                                                                                                        | <i>Support for judgement</i>                                                           |
| Random sequence generation (selection bias)                                                                   | Low risk                                                                                                                                                                                                                                                         | Computer generated randomization schedule                                              |
| Allocation concealment (selection bias)                                                                       | Likely low risk                                                                                                                                                                                                                                                  | No description of concealment, but balanced groups and experienced research centre     |
| Blinding of participants and personnel (performance bias)                                                     | High risk                                                                                                                                                                                                                                                        | Not blinded                                                                            |
| Blinding of outcome assessment (detection bias)<br><i>AF, RRT, digital ischemia, myocardial injury and VT</i> | High Risk                                                                                                                                                                                                                                                        | Not blinded                                                                            |
| Blinding of outcome assessment (detection bias)<br><i>Mortality, Stroke, LOS</i>                              | Low risk                                                                                                                                                                                                                                                         | Not blinded, but objective outcomes                                                    |
| Incomplete outcome data (attrition bias)<br><i>All outcomes</i>                                               | Likely low risk                                                                                                                                                                                                                                                  | Not specified whether exclusion happened after randomization, but very short follow-up |
| Selective reporting (reporting bias)<br><i>All outcomes</i>                                                   | Likely low risk                                                                                                                                                                                                                                                  | All outcomes reported as specified                                                     |
| Other bias                                                                                                    | Low risk                                                                                                                                                                                                                                                         | None detected                                                                          |

**Barzegar 2014<sup>6</sup>**

|                                                                                                               |                                                                                                                                                          |                                                                                                                                                  |
|---------------------------------------------------------------------------------------------------------------|----------------------------------------------------------------------------------------------------------------------------------------------------------|--------------------------------------------------------------------------------------------------------------------------------------------------|
| Methods                                                                                                       | Single-centre open-label randomized controlled study at a tertiary care university hospital in Iran                                                      |                                                                                                                                                  |
| Participants                                                                                                  | Adult participants with septic shock within 12 hours of ICU admission.<br><br>Mean age = 64 years, 63% male, 43% lung infection, SOFA score = 12 (N= 30) |                                                                                                                                                  |
| Interventions                                                                                                 | Vasopressin 0.03 u/min versus Norepinephrine adjusted to MAP > 65 mm Hg                                                                                  |                                                                                                                                                  |
| Open-label Catecholamines Permitted                                                                           | Yes                                                                                                                                                      |                                                                                                                                                  |
| Outcomes Reported in Manuscript                                                                               | Mortality (e.g. ICU, 28 days), requirement for renal replacement therapy, limb ischemia (i.e. digital ischemia), and ICU length of stay                  |                                                                                                                                                  |
| Outcomes Clarified by Contacting Authors                                                                      | Authors contacted. No reply received.                                                                                                                    |                                                                                                                                                  |
| Potential Conflicts                                                                                           | No funding source stated. Declarations of interest: none stated.                                                                                         |                                                                                                                                                  |
| Notes                                                                                                         | N/A                                                                                                                                                      |                                                                                                                                                  |
| <b>Risk of bias</b>                                                                                           |                                                                                                                                                          |                                                                                                                                                  |
| <i>Bias domain</i>                                                                                            | <i>Authors' judgement</i>                                                                                                                                | <i>Support for judgement</i>                                                                                                                     |
| Random sequence generation (selection bias)                                                                   | Low risk of bias                                                                                                                                         | Data-processor generated random number list                                                                                                      |
| Allocation concealment (selection bias)                                                                       | Likely high risk of bias                                                                                                                                 | No description of concealment, no registered protocol, no previous publications by research team upon which to judge prior methodological rigour |
| Blinding of outcome assessment (detection bias)<br><i>AF, RRT, digital ischemia, myocardial injury and VT</i> | High risk of bias                                                                                                                                        | Neither clinicians nor researchers were blinded                                                                                                  |
| Blinding of outcome assessment (detection bias)<br><i>Mortality, Stroke, LOS</i>                              | High risk of bias                                                                                                                                        | Open-label                                                                                                                                       |
| Blinding of outcome assessment (detection bias)<br><i>Other outcomes</i>                                      | Low risk of bias                                                                                                                                         | Objective outcomes                                                                                                                               |
| Incomplete outcome data (attrition bias)<br><i>All outcomes</i>                                               | Low risk of bias                                                                                                                                         | Randomization after exclusion. Reasons mentioned. Complete follow up                                                                             |
| Selective reporting (reporting bias)<br><i>All outcomes</i>                                                   | Low risk of bias                                                                                                                                         | All primary outcomes pre-specified and reported. Protocol is explained.                                                                          |
| Other bias                                                                                                    | Low risk of bias                                                                                                                                         | None detected                                                                                                                                    |

### Capoletto 2017<sup>7</sup>

|                                                                                                               |                                                                                                                                                                                                             |                                                   |
|---------------------------------------------------------------------------------------------------------------|-------------------------------------------------------------------------------------------------------------------------------------------------------------------------------------------------------------|---------------------------------------------------|
| Methods                                                                                                       | Double-blind randomized controlled study at a hospital in Brazil                                                                                                                                            |                                                   |
| Participants                                                                                                  | Adult participants with cancer and septic shock (N=107)                                                                                                                                                     |                                                   |
| Interventions                                                                                                 | Vasopressin (not described)<br>versus<br>Norepinephrine (not described)                                                                                                                                     |                                                   |
| Open-label Catecholamines Permitted                                                                           | Yes                                                                                                                                                                                                         |                                                   |
| Outcomes Reported in Abstract                                                                                 | 28-day mortality, other unspecified serious adverse events                                                                                                                                                  |                                                   |
| Outcomes Clarified by Contacting Authors                                                                      | Atrial Fibrillation, Ventricular Arrhythmia, Myocardial Injury, Stroke, Acute Kidney Injury, Renal Replacement Therapy, Limb Ischemia, Length of ICU Stay, Length of Hospital Stay, 30 and 90 day mortality |                                                   |
| Potential Conflicts                                                                                           | Funding source: not stated. Declarations of interest: none stated.                                                                                                                                          |                                                   |
| Notes                                                                                                         | NCT01718613                                                                                                                                                                                                 |                                                   |
| <b>Risk of bias</b>                                                                                           |                                                                                                                                                                                                             |                                                   |
| <i>Bias domain</i>                                                                                            | <i>Authors' judgement</i>                                                                                                                                                                                   | <i>Support for judgement</i>                      |
| Random sequence generation (selection bias)                                                                   | Likely low risk of bias                                                                                                                                                                                     | Not stated, but authors have no issues previously |
| Allocation concealment (selection bias)                                                                       | Likely low risk of bias                                                                                                                                                                                     | Not stated, but authors have no issues previously |
| Blinding of participants and personnel (performance bias)                                                     | Low risk of bias                                                                                                                                                                                            | Double blind                                      |
| Blinding of outcome assessment (detection bias)<br><i>AF, RRT, digital ischemia, myocardial injury and VT</i> | Low risk of bias                                                                                                                                                                                            | Double blind                                      |
| Blinding of outcome assessment (detection bias)<br><i>Mortality, Stroke, LOS</i>                              | Low risk of bias                                                                                                                                                                                            | Objective outcomes                                |
| Incomplete outcome data (attrition bias)<br><i>All outcomes</i>                                               | Likely low risk of bias                                                                                                                                                                                     | No issues previously with authors                 |
| Selective reporting (reporting bias)<br><i>All outcomes</i>                                                   | Likely low risk of bias                                                                                                                                                                                     | Outcomes consistent with NCT registered protocol  |
| Other bias                                                                                                    | High risk of bias                                                                                                                                                                                           | Abstract only                                     |

### Chen 2017<sup>8</sup>

|                                                                                                               |                                                                                                                                      |                                                               |
|---------------------------------------------------------------------------------------------------------------|--------------------------------------------------------------------------------------------------------------------------------------|---------------------------------------------------------------|
| Methods                                                                                                       | Single-blind randomized controlled study at a hospital in China                                                                      |                                                               |
| Participants                                                                                                  | Adult participants with ARDS and septic shock (N=57)                                                                                 |                                                               |
| Interventions                                                                                                 | Terlipressin (0.01-0.04U/min) and norepinephrine as needed to maintain MAP between 65 and 75 mm Hg versus Norepinephrine (>1mcg/min) |                                                               |
| Open-label Catecholamines Permitted                                                                           | Yes                                                                                                                                  |                                                               |
| Outcomes Reported in Manuscript                                                                               | 28-day mortality, Length of ICU Stay, Length of Hospital Stay                                                                        |                                                               |
| Outcomes Clarified by Contacting Authors                                                                      | Authors contacted. No response from authors                                                                                          |                                                               |
| Potential Conflicts                                                                                           | Funding source: Social Development Fund of Jiangxi Province (20151BBG70120). Declarations of interest: none stated.                  |                                                               |
| Notes                                                                                                         |                                                                                                                                      |                                                               |
| <b>Risk of bias</b>                                                                                           |                                                                                                                                      |                                                               |
| <i>Bias domain</i>                                                                                            | <i>Authors' judgement</i>                                                                                                            | <i>Support for judgement</i>                                  |
| Random sequence generation (selection bias)                                                                   | Likely low risk of bias                                                                                                              | Randomization by randomised number table derived by computer. |
| Allocation concealment (selection bias)                                                                       | Likely high risk of bias                                                                                                             | Not described                                                 |
| Blinding of participants and personnel (performance bias)                                                     | High risk of bias                                                                                                                    | Single blind                                                  |
| Blinding of outcome assessment (detection bias)<br><i>AF, RRT, digital ischemia, myocardial injury and VT</i> | High risk of bias                                                                                                                    | Single blind                                                  |
| Blinding of outcome assessment (detection bias)<br><i>Mortality, Stroke, LOS</i>                              | Low risk of bias                                                                                                                     | Objective outcomes                                            |
| Incomplete outcome data (attrition bias)<br><i>All outcomes</i>                                               | Likely high risk of bias                                                                                                             | Large numbers of post-randomization exclusions in both arms   |
| Selective reporting (reporting bias)<br><i>All outcomes</i>                                                   | Likely low risk of bias                                                                                                              | No protocol to review, but standard outcomes are reported     |
| Other bias                                                                                                    | Low risk of bias                                                                                                                     | None detected                                                 |

**Choudhury 2016<sup>9</sup>**

|                                                                                                               |                                                                                                                                                                          |                                                                                |
|---------------------------------------------------------------------------------------------------------------|--------------------------------------------------------------------------------------------------------------------------------------------------------------------------|--------------------------------------------------------------------------------|
| Methods                                                                                                       | Single-centre open-label randomized controlled study at an institutional hospital in India                                                                               |                                                                                |
| Participants                                                                                                  | Adult participants with cirrhosis and septic shock<br>Mean age = 48 years, 82% male, 35% lung infection, SOFA score = 14.3 (N=84)                                        |                                                                                |
| Interventions                                                                                                 | Terlipressin 1.3-5.2mcg/min over 24 h<br>versus<br>Norepinephrine 7.5-60mcg/min                                                                                          |                                                                                |
| Open-label Catecholamines Permitted                                                                           | Yes                                                                                                                                                                      |                                                                                |
| Outcomes Reported in Manuscript                                                                               | Atrial fibrillation, 28-day mortality, ventricular arrhythmia (e.g. ventricular tachycardia), limb ischemia (i.e. peripheral cyanosis), hospital and ICU lengths of stay |                                                                                |
| Outcomes Clarified by Contacting Authors                                                                      | Authors contacted. No reply received.                                                                                                                                    |                                                                                |
| Potential Conflicts                                                                                           | Funding source not stated. Declarations of interest: none stated.                                                                                                        |                                                                                |
| Notes                                                                                                         | NCT01836224                                                                                                                                                              |                                                                                |
| <b>Risk of bias</b>                                                                                           |                                                                                                                                                                          |                                                                                |
| <i>Bias domain</i>                                                                                            | <i>Authors' judgement</i>                                                                                                                                                | <i>Support for judgement</i>                                                   |
| Random sequence generation (selection bias)                                                                   | Likely low risk of bias                                                                                                                                                  | Describes block randomization, but does not describe how blocks were generated |
| Allocation concealment (selection bias)                                                                       | Low risk of bias                                                                                                                                                         | Used SNOSE technique                                                           |
| Blinding of participants and personnel (performance bias)                                                     | High risk of bias                                                                                                                                                        | Open label                                                                     |
| Blinding of outcome assessment (detection bias)<br><i>AF, RRT, digital ischemia, myocardial injury and VT</i> | High risk of bias                                                                                                                                                        | Open label                                                                     |
| Blinding of outcome assessment (detection bias)<br><i>Mortality, Stroke, LOS</i>                              | Low risk of bias                                                                                                                                                         | Objective outcomes                                                             |
| Incomplete outcome data (attrition bias)<br><i>All outcomes</i>                                               | Low risk of bias                                                                                                                                                         | All patients accounted for                                                     |
| Selective reporting (reporting bias)<br><i>All outcomes</i>                                                   | Low risk of bias                                                                                                                                                         | All primary outcomes pre-specified and reported. Protocol is explained.        |
| Other bias                                                                                                    | Low risk of bias                                                                                                                                                         | None detected                                                                  |

**Clem 2016<sup>10</sup>**

|                                                                                                               |                                                                                                                                                                                                                                                                                                                                                                             |                                                                                                              |
|---------------------------------------------------------------------------------------------------------------|-----------------------------------------------------------------------------------------------------------------------------------------------------------------------------------------------------------------------------------------------------------------------------------------------------------------------------------------------------------------------------|--------------------------------------------------------------------------------------------------------------|
| Methods                                                                                                       | Single-centre open-label randomized controlled study at a tertiary care university hospital in the United States                                                                                                                                                                                                                                                            |                                                                                                              |
| Participants                                                                                                  | Adult participants with septic shock<br>APACHE II score = 26 (N=82)                                                                                                                                                                                                                                                                                                         |                                                                                                              |
| Interventions                                                                                                 | Vasopressin and norepinephrine: norepinephrine (0.05 to 0.5 mcg/kg/min) and vasopressin (0.04 units/min) given by continuous infusion to achieve and maintain a target mean arterial pressure (65-75 mm Hg)<br>versus<br>Norepinephrine (0.05 to 0.5 mcg/kg/min) will be given by continuous infusion to achieve and maintain a target mean arterial pressure (65-75 mm Hg) |                                                                                                              |
| Open-label Catecholamines Permitted                                                                           | Yes                                                                                                                                                                                                                                                                                                                                                                         |                                                                                                              |
| Outcomes Reported in Abstract                                                                                 | Mortality                                                                                                                                                                                                                                                                                                                                                                   |                                                                                                              |
| Outcomes Clarified by Contacting Authors                                                                      | Atrial fibrillation, Ventricular Arrhythmia                                                                                                                                                                                                                                                                                                                                 |                                                                                                              |
| Potential Conflicts                                                                                           | Funding source not stated. Declarations of interest: not stated.                                                                                                                                                                                                                                                                                                            |                                                                                                              |
| Notes                                                                                                         | Unpublished information made available from authors.<br>NCT02454348, NOVEL Trial                                                                                                                                                                                                                                                                                            |                                                                                                              |
| <b>Risk of bias</b>                                                                                           |                                                                                                                                                                                                                                                                                                                                                                             |                                                                                                              |
| <i>Bias domain</i>                                                                                            | <i>Authors' judgement</i>                                                                                                                                                                                                                                                                                                                                                   | <i>Support for judgement</i>                                                                                 |
| Random sequence generation (selection bias)                                                                   | Likely low risk of bias                                                                                                                                                                                                                                                                                                                                                     | No description, but described as randomized                                                                  |
| Allocation concealment (selection bias)                                                                       | Likely low risk of bias                                                                                                                                                                                                                                                                                                                                                     | No description but registered protocol, experienced research team and no obvious differences between groups. |
| Blinding of participants and personnel (performance bias)                                                     | High risk of bias                                                                                                                                                                                                                                                                                                                                                           | Open label                                                                                                   |
| Blinding of outcome assessment (detection bias)<br><i>AF, RRT, digital ischemia, myocardial injury and VT</i> | High risk of bias                                                                                                                                                                                                                                                                                                                                                           | Open label                                                                                                   |
| Blinding of outcome assessment (detection bias)<br><i>Mortality, Stroke, LOS</i>                              | Low risk of bias                                                                                                                                                                                                                                                                                                                                                            | Objective outcomes                                                                                           |
| Incomplete outcome data (attrition bias)<br><i>All outcomes</i>                                               | Likely low risk of bias                                                                                                                                                                                                                                                                                                                                                     | Complete follow up                                                                                           |
| Selective reporting (reporting bias)<br><i>All outcomes</i>                                                   | Low risk of bias                                                                                                                                                                                                                                                                                                                                                            | All primary outcomes pre-specified and reported. Protocol is registered and explained.                       |
| Other bias                                                                                                    | High risk of bias                                                                                                                                                                                                                                                                                                                                                           | Currently published only as abstract                                                                         |

**Dünser 2003<sup>11</sup>**

|                                                                                                               |                                                                                                                                                                                                                                           |                                                                                          |
|---------------------------------------------------------------------------------------------------------------|-------------------------------------------------------------------------------------------------------------------------------------------------------------------------------------------------------------------------------------------|------------------------------------------------------------------------------------------|
| Methods                                                                                                       | Single-centre open-label randomized controlled study at a tertiary care university hospital in Austria                                                                                                                                    |                                                                                          |
| Participants                                                                                                  | Adult participants (some post cardiectomy) with vasodilatory shock. Systemic Inflammatory Response Syndrome (29%), Septic Shock (31%), Post-cardiectomy shock (40%)<br>Mean age = 68 years, MODS score = 12 (N=48)                        |                                                                                          |
| Interventions                                                                                                 | Vasopressin at a constant rate of 4 U/h<br>versus<br>Norepinephrine: in NE patients, MAP 70 mm Hg was achieved by adjusting NE infusion as necessary. For those patients in whom NE requirements exceeded 2.26 mcg/ kg/min, AVP was added |                                                                                          |
| Open-label Catecholamines Permitted                                                                           | Yes                                                                                                                                                                                                                                       |                                                                                          |
| Outcomes Reported in Manuscript                                                                               | Atrial fibrillation, ICU mortality, myocardial injury (e.g. myocardial infarction or ischemia), requirement for renal replacement therapy, ICU length of stay                                                                             |                                                                                          |
| Outcomes Clarified by Contacting Authors                                                                      | Atrial Fibrillation, Mortality, Myocardial Infarction, Acute Kidney Injury                                                                                                                                                                |                                                                                          |
| Potential Conflicts                                                                                           | Funding source: Lorenz Böhler Fund. Declarations of interest: none stated.                                                                                                                                                                |                                                                                          |
| Notes                                                                                                         | N/A                                                                                                                                                                                                                                       |                                                                                          |
| <b>Risk of bias</b>                                                                                           |                                                                                                                                                                                                                                           |                                                                                          |
| <i>Bias domain</i>                                                                                            | <i>Authors' judgement</i>                                                                                                                                                                                                                 | <i>Support for judgement</i>                                                             |
| Random sequence generation (selection bias)                                                                   | Likely low risk of bias                                                                                                                                                                                                                   | Using a random number-generating scheme                                                  |
| Allocation concealment (selection bias)                                                                       | Low risk of bias                                                                                                                                                                                                                          | No description, but experienced research team and no obvious differences between groups. |
| Blinding of participants and personnel (performance bias)                                                     | High risk of bias                                                                                                                                                                                                                         | Open label                                                                               |
| Blinding of outcome assessment (detection bias)<br><i>AF, RRT, digital ischemia, myocardial injury and VT</i> | High risk of bias                                                                                                                                                                                                                         | Open label                                                                               |
| Blinding of outcome assessment (detection bias)<br><i>Mortality, Stroke, LOS</i>                              | Low risk of bias                                                                                                                                                                                                                          | Objective outcomes                                                                       |
| Incomplete outcome data (attrition bias)<br><i>All outcomes</i>                                               | Low risk of bias                                                                                                                                                                                                                          | All outcomes reported                                                                    |
| Selective reporting (reporting bias)<br><i>All outcomes</i>                                                   | Low risk of bias                                                                                                                                                                                                                          | No protocol, standard outcomes                                                           |
| Other bias                                                                                                    | Low risk of bias                                                                                                                                                                                                                          | None detected                                                                            |

**Fonseca Ruiz 2013<sup>12</sup>**

|                                                                                                               |                                                                                                                                                                                                                                                               |                                                                     |
|---------------------------------------------------------------------------------------------------------------|---------------------------------------------------------------------------------------------------------------------------------------------------------------------------------------------------------------------------------------------------------------|---------------------------------------------------------------------|
| Methods                                                                                                       | Single-centre open-label randomized controlled study at a hospital in Colombia                                                                                                                                                                                |                                                                     |
| Participants                                                                                                  | Adult participants with septic shock<br>Mean age = 58 years, 59% male, 34% lung infection, APACHE II score = 19 (N=30)                                                                                                                                        |                                                                     |
| Interventions                                                                                                 | Vasopressin: noradrenaline plus vasopressin at titrated doses of 0.01 U / min and increasing every 10 minutes 0.01 U / min to achieve a mean arterial pressure (MAP) of 65 mm Hg or until reaching maximum doses of 0.04 U / min.<br>versus<br>Norepinephrine |                                                                     |
| Open-label Catecholamines Permitted                                                                           | Yes                                                                                                                                                                                                                                                           |                                                                     |
| Outcomes                                                                                                      | 28-day mortality, limb ischemia (e.g. digital ischemia), hospital length of stay                                                                                                                                                                              |                                                                     |
| Outcomes Clarified by Contacting Authors                                                                      | Authors contacted. No reply received.                                                                                                                                                                                                                         |                                                                     |
| Potential Conflicts                                                                                           | Funding source: not stated. Declarations of interest: none stated.                                                                                                                                                                                            |                                                                     |
| Notes                                                                                                         | Identified by contacting the authors of an abstract that met inclusion criteria. Full-text in Spanish                                                                                                                                                         |                                                                     |
| <b>Risk of bias</b>                                                                                           |                                                                                                                                                                                                                                                               |                                                                     |
| <i>Bias domain</i>                                                                                            | <i>Authors' judgement</i>                                                                                                                                                                                                                                     | <i>Support for judgement</i>                                        |
| Random sequence generation (selection bias)                                                                   | Low risk of bias                                                                                                                                                                                                                                              | Patient randomization was done with statistical software            |
| Allocation concealment (selection bias)                                                                       | Low risk of bias                                                                                                                                                                                                                                              | Assignment to the treatments was carried out using sealed envelopes |
| Blinding of participants and personnel (performance bias)                                                     | High risk of bias                                                                                                                                                                                                                                             | Open label                                                          |
| Blinding of outcome assessment (detection bias)<br><i>AF, RRT, digital ischemia, myocardial injury and VT</i> | High risk of bias                                                                                                                                                                                                                                             | Open label                                                          |
| Blinding of outcome assessment (detection bias)<br><i>Mortality, Stroke, LOS</i>                              | Low risk of bias                                                                                                                                                                                                                                              | Objective outcomes                                                  |
| Incomplete outcome data (attrition bias)<br><i>All outcomes</i>                                               | Low risk of bias                                                                                                                                                                                                                                              | All subjects accounted for                                          |
| Selective reporting (reporting bias)<br><i>All outcomes</i>                                                   | Low risk of bias                                                                                                                                                                                                                                              | No protocol, but standard outcomes                                  |
| Other bias                                                                                                    | Low risk of bias                                                                                                                                                                                                                                              | None detected                                                       |



**Gordon 2016<sup>13</sup>**

|                                          |                                                                                                                                                                                                                             |
|------------------------------------------|-----------------------------------------------------------------------------------------------------------------------------------------------------------------------------------------------------------------------------|
| Methods                                  | Multicentre 2x2 factorial double blind with hydrocortisone randomized controlled study at 18 adult ICUs in the UK                                                                                                           |
| Participants                             | adult patients who had septic shock requiring vasopressors despite fluid resuscitation within a maximum of 6 hours after the onset of shock.<br>Mean age = 66, 58% male, 40% lung infection, APACHE II score = 24 (N=421)   |
| Interventions                            | Vasopressin up to 0.06 U/min with target MAP 65-75 mm Hg or physician discretion<br>Versus Norepinephrine up to 12 mcg/min with target MAP 65-75 mm Hg or physician discretion                                              |
| Open-label Catecholamines Permitted      | Yes                                                                                                                                                                                                                         |
| Outcomes Reported in Manuscript          | Mortality (e.g. ICU and 28 days), myocardial injury (e.g. acute coronary syndrome), requirement for renal replacement therapy, acute kidney injury, limb ischemia (e.g. digital ischemia), hospital and ICU lengths of stay |
| Outcomes Clarified by Contacting Authors | Atrial fibrillation, Myocardial Ischemia                                                                                                                                                                                    |
| Potential Conflicts                      | Funding source: UKNIHR. Declarations of interest: All authors submitted the ICMJE Form for Disclosure.                                                                                                                      |
| Notes                                    | ISRCTN20769191, VANISH Trial                                                                                                                                                                                                |

**Risk of bias**

| <i>Bias domain</i>                                                                                            | <i>Authors' judgement</i> | <i>Support for judgement</i>                                                                                                                     |
|---------------------------------------------------------------------------------------------------------------|---------------------------|--------------------------------------------------------------------------------------------------------------------------------------------------|
| Random sequence generation (selection bias)                                                                   | Low risk of bias          | Variable block size randomization (4 and 8) using computer-generated random numbers, stratified by center.                                       |
| Allocation concealment (selection bias)                                                                       | Low risk of bias          | Allocation sequence was prepared by an independent statistician in the Clinical Trials Unit and concealed from all investigators and clinicians. |
| Blinding of participants and personnel (performance bias)                                                     | Low risk of bias          | Matching placebo and drug ampules.                                                                                                               |
| Blinding of outcome assessment (detection bias)<br><i>AF, RRT, digital ischemia, myocardial injury and VT</i> | Low risk of bias          | Blinded                                                                                                                                          |
| Blinding of outcome assessment (detection bias)<br><i>Mortality, Stroke, LOS</i>                              | Low risk of bias          | Blinded                                                                                                                                          |
| Incomplete outcome data (attrition bias)<br><i>All outcomes</i>                                               | Likely high risk of bias  | Modified intention to treat analysis, 9 patients randomized in vasopressin arm but not analyzed exceed fragility threshold                       |
| Selective reporting (reporting bias)<br><i>All outcomes</i>                                                   | Low risk of bias          | Consistent with published protocol                                                                                                               |
| Other bias                                                                                                    | Low risk of bias          | None detected                                                                                                                                    |

**Hajjar 2017<sup>14</sup>**

|                                                                                                               |                                                                                                                                                                                                                                                                                                                                                                                                                                                                                                                                                                                                                                    |                                                                                     |
|---------------------------------------------------------------------------------------------------------------|------------------------------------------------------------------------------------------------------------------------------------------------------------------------------------------------------------------------------------------------------------------------------------------------------------------------------------------------------------------------------------------------------------------------------------------------------------------------------------------------------------------------------------------------------------------------------------------------------------------------------------|-------------------------------------------------------------------------------------|
| Methods                                                                                                       | Single-centre double-blind randomized controlled study at a tertiary care university hospital in Brazil                                                                                                                                                                                                                                                                                                                                                                                                                                                                                                                            |                                                                                     |
| Participants                                                                                                  | Adult participants with post cardiac surgery vasoplegia<br>Mean age = 55 years, 54% male (N=330)                                                                                                                                                                                                                                                                                                                                                                                                                                                                                                                                   |                                                                                     |
| Interventions                                                                                                 | Vasopressin 0.01 to 0.06 U/min with MAP >65 mm Hg<br>Versus Norepinephrine 10-60 mcg/min with MAP >65 mm Hg                                                                                                                                                                                                                                                                                                                                                                                                                                                                                                                        |                                                                                     |
| Open-label Catecholamines Permitted                                                                           | Yes                                                                                                                                                                                                                                                                                                                                                                                                                                                                                                                                                                                                                                |                                                                                     |
| Outcomes Reported in Manuscript                                                                               | Atrial fibrillation, 30-day mortality, myocardial injury (e.g. postoperative acute myocardial infarction), ventricular arrhythmias, acute kidney injury, stroke, limb ischemia (not specified), hospital and ICU lengths of stay The initial primary outcomes were days alive and free of organ dysfunction at 28 days. However, after the trial had already started, because of the lack of outcome data in cardiac surgery, the study management committee decided that a more appropriate endpoint for cardiac surgery patients would be a composite endpoint of mortality or severe postoperative complications within 30 days |                                                                                     |
| Outcomes Clarified by Contacting Authors                                                                      | None                                                                                                                                                                                                                                                                                                                                                                                                                                                                                                                                                                                                                               |                                                                                     |
| Potential Conflicts                                                                                           | Funding source: University of Brazil, Sanus Pharmaceutical.<br>Declarations of interest: not stated.                                                                                                                                                                                                                                                                                                                                                                                                                                                                                                                               |                                                                                     |
| Notes                                                                                                         | NCT01505231, VANCS Study                                                                                                                                                                                                                                                                                                                                                                                                                                                                                                                                                                                                           |                                                                                     |
| <b>Risk of bias</b>                                                                                           |                                                                                                                                                                                                                                                                                                                                                                                                                                                                                                                                                                                                                                    |                                                                                     |
| <i>Bias domain</i>                                                                                            | <i>Authors' judgement</i>                                                                                                                                                                                                                                                                                                                                                                                                                                                                                                                                                                                                          | <i>Support for judgement</i>                                                        |
| Random sequence generation (selection bias)                                                                   | Low risk of bias                                                                                                                                                                                                                                                                                                                                                                                                                                                                                                                                                                                                                   | Patients were assigned according to a computer-generated random list                |
| Allocation concealment (selection bias)                                                                       | Low risk of bias                                                                                                                                                                                                                                                                                                                                                                                                                                                                                                                                                                                                                   | Allocation was concealed using opaque envelopes.                                    |
| Blinding of participants and personnel (performance bias)                                                     | Low risk of bias                                                                                                                                                                                                                                                                                                                                                                                                                                                                                                                                                                                                                   | Both study solutions were identical in appearance                                   |
| Blinding of outcome assessment (detection bias)<br><i>AF, RRT, digital ischemia, myocardial injury and VT</i> | Low risk of bias                                                                                                                                                                                                                                                                                                                                                                                                                                                                                                                                                                                                                   | Blinded                                                                             |
| Blinding of outcome assessment (detection bias)<br><i>Mortality, Stroke, LOS</i>                              | Low risk of bias                                                                                                                                                                                                                                                                                                                                                                                                                                                                                                                                                                                                                   | Objective outcomes                                                                  |
| Incomplete outcome data (attrition bias)<br><i>All outcomes</i>                                               | High risk of bias                                                                                                                                                                                                                                                                                                                                                                                                                                                                                                                                                                                                                  | Described modified ITT, did per-protocol, exclusions were not specified in protocol |
| Selective reporting (reporting bias)<br><i>All outcomes</i>                                                   | Low risk of bias                                                                                                                                                                                                                                                                                                                                                                                                                                                                                                                                                                                                                   | Protocol change does not affect reported outcomes                                   |
| Other bias                                                                                                    | Low risk of bias                                                                                                                                                                                                                                                                                                                                                                                                                                                                                                                                                                                                                   | None detected                                                                       |

Han 2012<sup>15</sup>

|                                                                                                               |                                                                                                                     |                                                                                                                                                                            |
|---------------------------------------------------------------------------------------------------------------|---------------------------------------------------------------------------------------------------------------------|----------------------------------------------------------------------------------------------------------------------------------------------------------------------------|
| Methods                                                                                                       | Single-centre open-label randomized controlled study at a hospital in China                                         |                                                                                                                                                                            |
| Participants                                                                                                  | Adult participants with septic shock<br>Mean age = 72, 71% male, 56% lung infection, APACHE II score = 27.4 (N=139) |                                                                                                                                                                            |
| Interventions                                                                                                 | Pituitrin 1.0-2.5 U/h<br>versus<br>Norepinephrine 2-20 mcg/kg/min                                                   |                                                                                                                                                                            |
| Open-label Catecholamines Permitted                                                                           | Yes                                                                                                                 |                                                                                                                                                                            |
| Outcomes Reported in Manuscript                                                                               | 28-day mortality, ICU length of stay                                                                                |                                                                                                                                                                            |
| Outcomes Clarified by Contacting Authors                                                                      | Authors contacted. No reply received.                                                                               |                                                                                                                                                                            |
| Potential Conflicts                                                                                           | Funding source: not stated. Declarations of interest: not stated.                                                   |                                                                                                                                                                            |
| Notes                                                                                                         | Full-text article in Chinese                                                                                        |                                                                                                                                                                            |
| <b>Risk of bias</b>                                                                                           |                                                                                                                     |                                                                                                                                                                            |
| <i>Bias domain</i>                                                                                            | <i>Authors' judgement</i>                                                                                           | <i>Support for judgement</i>                                                                                                                                               |
| Random sequence generation (selection bias)                                                                   | Likely high risk of bias                                                                                            | Process not described, large difference between arms                                                                                                                       |
| Allocation concealment (selection bias)                                                                       | Likely high risk of bias                                                                                            | No description of concealment, no registered protocol, no previous publications by research team upon which to judge prior methodological rigour, imbalance between groups |
| Blinding of participants and personnel (performance bias)                                                     | High risk of bias                                                                                                   | Open label                                                                                                                                                                 |
| Blinding of outcome assessment (detection bias)<br><i>AF, RRT, digital ischemia, myocardial injury and VT</i> | High risk of bias                                                                                                   | Open label                                                                                                                                                                 |
| Blinding of outcome assessment (detection bias)<br><i>Mortality, Stroke, LOS</i>                              | Low risk of bias                                                                                                    | Objective outcomes                                                                                                                                                         |
| Incomplete outcome data (attrition bias)<br><i>All outcomes</i>                                               | Likely high risk of bias                                                                                            | Unclear why patients were excluded                                                                                                                                         |
| Selective reporting (reporting bias)<br><i>All outcomes</i>                                                   | Likely low risk of bias                                                                                             | No protocol, but standard outcomes                                                                                                                                         |
| Other bias                                                                                                    | N/A                                                                                                                 | N/A                                                                                                                                                                        |

Hua 2013<sup>16</sup>

|                                                                                                               |                                                                                                                                                                         |                                                                                                                                                                            |
|---------------------------------------------------------------------------------------------------------------|-------------------------------------------------------------------------------------------------------------------------------------------------------------------------|----------------------------------------------------------------------------------------------------------------------------------------------------------------------------|
| Methods                                                                                                       | Single-centre open-label randomized controlled study at a hospital in China                                                                                             |                                                                                                                                                                            |
| Participants                                                                                                  | Adult participants with acute respiratory distress syndrome (ARDS) and septic shock<br>Mean age = 54 years, 56% male, 53% lung infection, APACHE II score = 18.5 (N=32) |                                                                                                                                                                            |
| Interventions                                                                                                 | Terlipressin continuous infusion of 1.3 mg/kg/h versus Dopamine infusion up to 20 mg/kg/min                                                                             |                                                                                                                                                                            |
| Open-label Catecholamines Permitted                                                                           | Yes                                                                                                                                                                     |                                                                                                                                                                            |
| Outcomes Reported in Manuscript                                                                               | 28-day mortality, hospital and ICU lengths of stay                                                                                                                      |                                                                                                                                                                            |
| Outcomes Clarified by Contacting Authors                                                                      | Authors contacted. No reply received.                                                                                                                                   |                                                                                                                                                                            |
| Potential Conflicts                                                                                           | Funding source: not stated. Declarations of interest: not stated.                                                                                                       |                                                                                                                                                                            |
| Notes                                                                                                         | N/A                                                                                                                                                                     |                                                                                                                                                                            |
| <b>Risk of bias</b>                                                                                           |                                                                                                                                                                         |                                                                                                                                                                            |
| <i>Bias domain</i>                                                                                            | <i>Authors' judgement</i>                                                                                                                                               | <i>Support for judgement</i>                                                                                                                                               |
| Random sequence generation (selection bias)                                                                   | Low risk of bias                                                                                                                                                        | Computer-generated random number table                                                                                                                                     |
| Allocation concealment (selection bias)                                                                       | Likely high risk of bias                                                                                                                                                | No description of concealment, no registered protocol, no previous publications by research team upon which to judge prior methodological rigour, imbalance between groups |
| Blinding of outcome assessment (detection bias)<br><i>AF, RRT, digital ischemia, myocardial injury and VT</i> | High risk of bias                                                                                                                                                       | Open label                                                                                                                                                                 |
| Blinding of outcome assessment (detection bias)<br><i>Mortality, Stroke, LOS</i>                              | High risk of bias                                                                                                                                                       | Open label                                                                                                                                                                 |
| Blinding of outcome assessment (detection bias)<br><i>Other outcomes</i>                                      | Low risk of bias                                                                                                                                                        | Objective outcomes                                                                                                                                                         |
| Incomplete outcome data (attrition bias)<br><i>All outcomes</i>                                               | Low risk of bias                                                                                                                                                        | All patients accounted for                                                                                                                                                 |
| Selective reporting (reporting bias)<br><i>All outcomes</i>                                                   | Likely low risk of bias                                                                                                                                                 | No protocol, but standard outcomes                                                                                                                                         |
| Other bias                                                                                                    | Low risk of bias                                                                                                                                                        | None detected                                                                                                                                                              |

**Lauzier 2006<sup>17</sup>**

|                                                                                                               |                                                                                                                                                          |                                                                      |
|---------------------------------------------------------------------------------------------------------------|----------------------------------------------------------------------------------------------------------------------------------------------------------|----------------------------------------------------------------------|
| Methods                                                                                                       | Two-centre open-label randomized controlled study at tertiary care university hospitals in Canada                                                        |                                                                      |
| Participants                                                                                                  | Adult participants with septic shock<br>Mean age = 55 years, 63% male, 47% lung infection, APACHE II score = 23.2 (N=23)                                 |                                                                      |
| Interventions                                                                                                 | Vasopressin 0.04–0.20 U/min<br>versus<br>Norepinephrine 0.1–2.8 mcg/kg/min                                                                               |                                                                      |
| Open-label Catecholamines Permitted                                                                           | Yes                                                                                                                                                      |                                                                      |
| Outcomes Reported in Manuscript                                                                               | Atrial fibrillation, ICU mortality, myocardial injury (e.g. acute coronary syndrome), ventricular arrhythmias, requirement for renal replacement therapy |                                                                      |
| Outcomes Clarified by Contacting Authors                                                                      | None.                                                                                                                                                    |                                                                      |
| Potential Conflicts                                                                                           | Funding source: Cardiovascular Critical Care Research Network FRSQ and departmental funding. Declarations of interest: not stated.                       |                                                                      |
| Notes                                                                                                         | N/A                                                                                                                                                      |                                                                      |
| <b>Risk of bias</b>                                                                                           |                                                                                                                                                          |                                                                      |
| <i>Bias domain</i>                                                                                            | <i>Authors' judgement</i>                                                                                                                                | <i>Support for judgement</i>                                         |
| Random sequence generation (selection bias)                                                                   | Low risk of bias                                                                                                                                         | Computer-generated block randomization list                          |
| Allocation concealment (selection bias)                                                                       | Low risk of bias                                                                                                                                         | Randomization was concealed using numbered, opaque sealed envelopes. |
| Blinding of participants and personnel (performance bias)                                                     | High risk of bias                                                                                                                                        | Open label                                                           |
| Blinding of outcome assessment (detection bias)<br><i>AF, RRT, digital ischemia, myocardial injury and VT</i> | High risk of bias                                                                                                                                        | Open label                                                           |
| Blinding of outcome assessment (detection bias)<br><i>Mortality, Stroke, LOS</i>                              | Low risk of bias                                                                                                                                         | Objective outcomes                                                   |
| Incomplete outcome data (attrition bias)<br><i>All outcomes</i>                                               | Low risk of bias                                                                                                                                         | All subjects accounted for                                           |
| Selective reporting (reporting bias)<br><i>All outcomes</i>                                                   | Low risk of bias                                                                                                                                         | No protocol, but standard outcomes                                   |
| Other bias                                                                                                    | Low risk of bias                                                                                                                                         | None detected                                                        |

**Malay 1999<sup>18</sup>**

|                                                                                                                         |                                                                                                                        |                                    |
|-------------------------------------------------------------------------------------------------------------------------|------------------------------------------------------------------------------------------------------------------------|------------------------------------|
| Methods                                                                                                                 | Single-centre double-blind randomized controlled study at a university hospital in the United States                   |                                    |
| Participants                                                                                                            | Adult participants with septic shock<br>Mean age = 55 years, 80% male, 40% lung infection, APACHE II score = 27 (N=10) |                                    |
| Interventions                                                                                                           | Vasopressin 0.04 U/min<br>versus<br>Placebo                                                                            |                                    |
| Open-label<br>Catecholamines Permitted                                                                                  | Yes                                                                                                                    |                                    |
| Outcomes Reported in<br>Manuscript                                                                                      | Atrial fibrillation, 24-hr mortality, myocardial injury (not specified),<br>ventricular arrhythmias                    |                                    |
| Outcomes Received by<br>Contacting Authors                                                                              | Atrial fibrillation                                                                                                    |                                    |
| Potential Conflicts                                                                                                     | Funding source: Allegheny-Singer Research Institute. Declarations<br>of interest: not stated.                          |                                    |
| Notes                                                                                                                   | Unpublished information made available from authors.                                                                   |                                    |
| <b>Risk of bias</b>                                                                                                     |                                                                                                                        |                                    |
| <i>Bias domain</i>                                                                                                      | <i>Authors' judgement</i>                                                                                              | <i>Support for judgement</i>       |
| Random sequence<br>generation<br>(selection bias)                                                                       | Low risk of bias                                                                                                       | Computer-generated list            |
| Allocation concealment<br>(selection bias)                                                                              | Likely low risk of bias                                                                                                | Described as handled by pharmacist |
| Blinding of participants and<br>personnel<br>(performance bias)                                                         | Low risk of bias                                                                                                       | Double-blind                       |
| Blinding of outcome<br>assessment<br>(detection bias)<br><i>AF, RRT, digital ischemia,<br/>myocardial injury and VT</i> | Low risk of bias                                                                                                       | Double-blind                       |
| Blinding of outcome<br>assessment<br>(detection bias)<br><i>Mortality, Stroke, LOS</i>                                  | Low risk of bias                                                                                                       | Blinded, objective outcomes        |
| Incomplete outcome data<br>(attrition bias)<br><i>All outcomes</i>                                                      | Low risk of bias                                                                                                       | All subjects accounted for         |
| Selective reporting<br>(reporting bias)<br><i>All outcomes</i>                                                          | Low risk of bias                                                                                                       | No protocol, but standard outcomes |
| Other bias                                                                                                              | Low risk of bias                                                                                                       | None detected                      |

**Morelli 2009<sup>19</sup>**

|                                                                                                               |                                                                                                                                                                                                 |                                                                                         |
|---------------------------------------------------------------------------------------------------------------|-------------------------------------------------------------------------------------------------------------------------------------------------------------------------------------------------|-----------------------------------------------------------------------------------------|
| Methods                                                                                                       | Single-centre open-label randomized controlled study at a tertiary care university hospital in Italy                                                                                            |                                                                                         |
| Participants                                                                                                  | Adult participants with septic shock<br>Mean age = 66 years, 73% male, 38% lung infection, SAP score = 60 (N=45)                                                                                |                                                                                         |
| Interventions                                                                                                 | Vasopressin continuous infusion 0.03 U/min over a period of 48 hrs versus<br>Norepinephrine titrated as needed<br>versus<br>Terlipressin continuous infusion 1.3 mcg/kg over a period of 48 hrs |                                                                                         |
| Open-label Catecholamines Permitted                                                                           | Yes                                                                                                                                                                                             |                                                                                         |
| Outcomes Reported in Manuscript                                                                               | Atrial fibrillation, ICU mortality, requirement for renal replacement therapy, ICU length of stay                                                                                               |                                                                                         |
| Outcomes Clarified by Contacting Authors                                                                      | Atrial Fibrillation                                                                                                                                                                             |                                                                                         |
| Potential Conflicts                                                                                           | Funding source: Department of Anesthesiology and Intensive Care of the University of Rome 'La Sapienza'. Declarations of interest: None stated.                                                 |                                                                                         |
| Notes                                                                                                         | Unpublished information made available from authors.<br>NCT00481572                                                                                                                             |                                                                                         |
| <b>Risk of bias</b>                                                                                           |                                                                                                                                                                                                 |                                                                                         |
| <i>Bias domain</i>                                                                                            | <i>Authors' judgement</i>                                                                                                                                                                       | <i>Support for judgement</i>                                                            |
| Random sequence generation (selection bias)                                                                   | Low risk of bias                                                                                                                                                                                | Computer-based procedure                                                                |
| Allocation concealment (selection bias)                                                                       | Likely low risk of bias                                                                                                                                                                         | No description, but experienced research team and no obvious differences between groups |
| Blinding of participants and personnel (performance bias)                                                     | High risk of bias                                                                                                                                                                               | Open label                                                                              |
| Blinding of outcome assessment (detection bias)<br><i>AF, RRT, digital ischemia, myocardial injury and VT</i> | High risk of bias                                                                                                                                                                               | Open label                                                                              |
| Blinding of outcome assessment (detection bias)<br><i>Mortality, Stroke, LOS</i>                              | Low risk of bias                                                                                                                                                                                | Objective outcomes                                                                      |
| Incomplete outcome data (attrition bias)<br><i>All outcomes</i>                                               | Low risk of bias                                                                                                                                                                                | All subjects accounted for                                                              |
| Selective reporting (reporting bias)<br><i>All outcomes</i>                                                   | Low risk of bias                                                                                                                                                                                | Reported outcomes consistent with registered protocol                                   |
| Other bias                                                                                                    | Low risk of bias                                                                                                                                                                                | None detected                                                                           |

**Oliveira 2014<sup>20</sup>**

|                                                                                                               |                                                                                |                                                                                                                                                    |
|---------------------------------------------------------------------------------------------------------------|--------------------------------------------------------------------------------|----------------------------------------------------------------------------------------------------------------------------------------------------|
| Methods                                                                                                       | Single-centre double-blind randomized controlled study at a hospital in Brazil |                                                                                                                                                    |
| Participants                                                                                                  | Adult participants with septic shock (N=387)                                   |                                                                                                                                                    |
| Interventions                                                                                                 | Vasopressin 0.01-0.03 U/min versus Norepinephrine 0.05-2.0 mcg/kg/min          |                                                                                                                                                    |
| Open-label Catecholamines Permitted                                                                           | Yes                                                                            |                                                                                                                                                    |
| Outcomes Reported in Abstract                                                                                 | Mortality (e.g. 14 days, 28 days)                                              |                                                                                                                                                    |
| Outcomes Clarified by Contacting Authors                                                                      | Unable to locate author contact information                                    |                                                                                                                                                    |
| Potential Conflicts                                                                                           | Funding source: not stated. Declarations of interest: none stated.             |                                                                                                                                                    |
| Notes                                                                                                         | EVAS Study                                                                     |                                                                                                                                                    |
| <b>Risk of bias</b>                                                                                           |                                                                                |                                                                                                                                                    |
| <i>Bias domain</i>                                                                                            | <i>Authors' judgement</i>                                                      | <i>Support for judgement</i>                                                                                                                       |
| Random sequence generation (selection bias)                                                                   | Likely high risk of bias                                                       | No description of randomization, no registered protocol, no previous publications by research team upon which to judge prior methodological rigour |
| Allocation concealment (selection bias)                                                                       | Likely high risk of bias                                                       | No description of concealment, no registered protocol, no previous publications by research team upon which to judge prior methodological rigour   |
| Blinding of participants and personnel (performance bias)                                                     | Low risk of bias                                                               | Double blind                                                                                                                                       |
| Blinding of outcome assessment (detection bias)<br><i>AF, RRT, digital ischemia, myocardial injury and VT</i> | Low risk of bias                                                               | Double blind                                                                                                                                       |
| Blinding of outcome assessment (detection bias)<br><i>Mortality, Stroke, LOS</i>                              | Low risk of bias                                                               | Objective outcomes                                                                                                                                 |
| Incomplete outcome data (attrition bias)<br><i>All outcomes</i>                                               | Likely high risk of bias                                                       | Large trial, cannot confirm follow up or intention to treat                                                                                        |
| Selective reporting (reporting bias)<br><i>All outcomes</i>                                                   | Likely low risk of bias                                                        | No protocol, but appears to report standard outcomes                                                                                               |
| Other bias                                                                                                    | High risk of bias                                                              | Abstract only without published protocol                                                                                                           |



**Patel 2002<sup>21</sup>**

|                                                                                                               |                                                                                                                                                                  |                                                        |
|---------------------------------------------------------------------------------------------------------------|------------------------------------------------------------------------------------------------------------------------------------------------------------------|--------------------------------------------------------|
| Methods                                                                                                       | Multicentre double-blinded randomized controlled study at two tertiary care university hospitals in Canada                                                       |                                                        |
| Participants                                                                                                  | Adult participants with septic shock<br>Mean age = 68 years, 75% male gender, 55% lung infection, APACHE II score = 23 (N=24)                                    |                                                        |
| Interventions                                                                                                 | Vasopressin 0.01- 0.08 units/min<br>versus<br>Norepinephrine 2 -16 mcg/min                                                                                       |                                                        |
| Open-label Catecholamines Permitted                                                                           | Yes                                                                                                                                                              |                                                        |
| Outcomes Reported in Manuscript                                                                               | Myocardial injury (e.g. no change in ST segments), ventricular arrhythmias                                                                                       |                                                        |
| Outcomes Clarified by Contacting Authors                                                                      | Authors contacted. Reported that data was not available.                                                                                                         |                                                        |
| Potential Conflicts                                                                                           | Funding source: British Columbia Lung Association/St. Paul's Hospital Foundation, Vancouver, British Columbia, Canada.<br>Declarations of interest: none stated. |                                                        |
| Notes                                                                                                         | N/A                                                                                                                                                              |                                                        |
| <b>Risk of bias</b>                                                                                           |                                                                                                                                                                  |                                                        |
| <i>Bias domain</i>                                                                                            | <i>Authors' judgement</i>                                                                                                                                        | <i>Support for judgement</i>                           |
| Random sequence generation (selection bias)                                                                   | Low risk of bias                                                                                                                                                 | Computer-based procedure                               |
| Allocation concealment (selection bias)                                                                       | Likely low risk of bias                                                                                                                                          | No description, but no issue in authors' previous work |
| Blinding of participants and personnel (performance bias)                                                     | Low risk of bias                                                                                                                                                 | Double blind                                           |
| Blinding of outcome assessment (detection bias)<br><i>AF, RRT, digital ischemia, myocardial injury and VT</i> | Low risk of bias                                                                                                                                                 | Double blind                                           |
| Blinding of outcome assessment (detection bias)<br><i>Mortality, Stroke, LOS</i>                              | Low risk of bias                                                                                                                                                 | Double blind, objective outcomes                       |
| Incomplete outcome data (attrition bias)<br><i>All outcomes</i>                                               | Low risk of bias                                                                                                                                                 | All subjects accounted for                             |
| Selective reporting (reporting bias)<br><i>All outcomes</i>                                                   | Low risk of bias                                                                                                                                                 | No protocol but standard outcomes                      |
| Other bias                                                                                                    | Low risk of bias                                                                                                                                                 | None detected                                          |

**Prakash 2017<sup>22</sup>**

|                                                                                                               |                                                                                                                                                        |                                                                                                           |
|---------------------------------------------------------------------------------------------------------------|--------------------------------------------------------------------------------------------------------------------------------------------------------|-----------------------------------------------------------------------------------------------------------|
| Methods                                                                                                       | Open-label randomized controlled study in India                                                                                                        |                                                                                                           |
| Participants                                                                                                  | Adult participants with cirrhosis and sepsis (N=184)                                                                                                   |                                                                                                           |
| Interventions                                                                                                 | Terlipressin (fixed dose infusion at 2mg/24hrs) and noradrenaline (3.75 to 30 mcg/min), target MAP > 65 mm Hg versus Noradrenaline (7.5 to 60 mcg/min) |                                                                                                           |
| Open-label Catecholamines Permitted                                                                           | Yes                                                                                                                                                    |                                                                                                           |
| Outcomes Reported in Abstract                                                                                 | 30-day mortality                                                                                                                                       |                                                                                                           |
| Outcomes Clarified by Contacting Authors                                                                      | No response yet                                                                                                                                        |                                                                                                           |
| Potential Conflicts                                                                                           | Funding source: not stated. Declarations of interest: none stated.                                                                                     |                                                                                                           |
| Notes                                                                                                         | NCT02468063                                                                                                                                            |                                                                                                           |
| <b>Risk of bias</b>                                                                                           |                                                                                                                                                        |                                                                                                           |
| <i>Bias domain</i>                                                                                            | <i>Authors' judgement</i>                                                                                                                              | <i>Support for judgement</i>                                                                              |
| Random sequence generation (selection bias)                                                                   | Likely low risk of bias                                                                                                                                | Not described but described as having comparable baseline demographic, clinical and laboratory parameters |
| Allocation concealment (selection bias)                                                                       | Likely low risk of bias                                                                                                                                | Not described but described as having comparable baseline demographic, clinical and laboratory parameters |
| Blinding of participants and personnel (performance bias)                                                     | High risk of bias                                                                                                                                      | Open-label                                                                                                |
| Blinding of outcome assessment (detection bias)<br><i>AF, RRT, digital ischemia, myocardial injury and VT</i> | High risk of bias                                                                                                                                      | Open-label                                                                                                |
| Blinding of outcome assessment (detection bias)<br><i>Mortality, Stroke, LOS</i>                              | Low risk of bias                                                                                                                                       | Objective outcomes                                                                                        |
| Incomplete outcome data (attrition bias)<br><i>All outcomes</i>                                               | Likely low risk of bias                                                                                                                                | No evidence of missing data                                                                               |
| Selective reporting (reporting bias)<br><i>All outcomes</i>                                                   | Low risk of bias                                                                                                                                       | Outcomes consistent with NCT registered protocol                                                          |
| Other bias                                                                                                    | High risk of bias                                                                                                                                      | Abstract only                                                                                             |

**Russell 2008<sup>23</sup>**

|                                          |                                                                                                                                                                                                                                  |
|------------------------------------------|----------------------------------------------------------------------------------------------------------------------------------------------------------------------------------------------------------------------------------|
| Methods                                  | Multicentre double-blind randomized controlled study at hospitals in Canada, Australia, and the United States                                                                                                                    |
| Participants                             | Adult participants with septic shock<br>Mean age = 61 years, 61% male, 42% lung infection, APACHE II score = 27.1 (N=802)                                                                                                        |
| Interventions                            | Vasopressin started at 0.01 U/min, titrated up to 0.03 U/min with target MAP 65-75 mm Hg or physician discretion<br>Versus Norepinephrine 5 mcg/min up to 15 mcg/min with target MAP 65-75 mm Hg or physician discretion         |
| Open-label Catecholamines Permitted      | Yes                                                                                                                                                                                                                              |
| Outcomes Reported in Manuscript          | Atrial fibrillation, mortality (e.g. 28 days, 90 days), myocardial injury (e.g. acute myocardial infarction or ischemia), stroke (e.g. cerebrovascular accident), limb ischemia (e.g. digital), hospital and ICU lengths of stay |
| Outcomes Clarified by Contacting Authors | None                                                                                                                                                                                                                             |
| Potential Conflicts                      | Funding source: Canadian Institutes of Health Research.<br>Declarations of interest: Stake in related companies.                                                                                                                 |
| Notes                                    | SRCTN94845869, VASST Trial, Atrial Fibrillation data from Day 1 values from sub-study: Mehta, S et al.. <i>Critical Care (London, England)</i> 2013; 17(3):R117.                                                                 |

**Risk of bias**

| <i>Bias domain</i>                                                                                            | <i>Authors' judgement</i> | <i>Support for judgement</i>                                                                                          |
|---------------------------------------------------------------------------------------------------------------|---------------------------|-----------------------------------------------------------------------------------------------------------------------|
| Random sequence generation (selection bias)                                                                   | Low risk of bias          | Central telephone randomization system                                                                                |
| Allocation concealment (selection bias)                                                                       | Low risk of bias          | Central telephone randomization system                                                                                |
| Blinding of participants and personnel (performance bias)                                                     | Low risk of bias          | Double blind                                                                                                          |
| Blinding of outcome assessment (detection bias)<br><i>AF, RRT, digital ischemia, myocardial injury and VT</i> | Low risk of bias          | Double blind                                                                                                          |
| Blinding of outcome assessment (detection bias)<br><i>Mortality, Stroke, LOS</i>                              | Low risk of bias          | Double blind, objective outcomes                                                                                      |
| Incomplete outcome data (attrition bias)<br><i>All outcomes</i>                                               | Likely low risk of bias   | All subjects accounted for, intention to treat analysis for mortality outcome, modified intention to treat for others |
| Selective reporting (reporting bias)<br><i>All outcomes</i>                                                   | Low risk of bias          | Consistent with protocol                                                                                              |
| Other bias                                                                                                    | Low risk of bias          | None stated                                                                                                           |

**Russell 2017<sup>24</sup>**

|                                                                                                               |                                                                                                                                                              |                                   |
|---------------------------------------------------------------------------------------------------------------|--------------------------------------------------------------------------------------------------------------------------------------------------------------|-----------------------------------|
| Methods                                                                                                       | Multicentre double-blind randomized controlled study of patients from Belgium, Denmark and the United States                                                 |                                   |
| Participants                                                                                                  | Adult participants with septic shock<br>Median age = 63.2 years, 45 and 71% mal, APACHE II score = 12 (N=53)                                                 |                                   |
| Interventions                                                                                                 | Selepressin infused at 1.25, 2.5 or 3.75 ng/kg/min until shock resolution or a maximum of 7 days<br>Placebo<br>Open label norepinephrine to achieve MAP > 65 |                                   |
| Open-label Catecholamines Permitted                                                                           | Yes                                                                                                                                                          |                                   |
| Outcomes Reported in Manuscript                                                                               | Atrial fibrillation, mortality (e.g. 28 days), myocardial injury, limb ischemia                                                                              |                                   |
| Outcomes Clarified by Contacting Authors                                                                      | None                                                                                                                                                         |                                   |
| Potential Conflicts                                                                                           | Funding source: Ferring pharmaceuticals, patents related to the use of vasopressin in septic shock                                                           |                                   |
| Notes                                                                                                         | NCT01000649                                                                                                                                                  |                                   |
| <b>Risk of bias</b>                                                                                           |                                                                                                                                                              |                                   |
| <i>Bias domain</i>                                                                                            | <i>Authors' judgement</i>                                                                                                                                    | <i>Support for judgement</i>      |
| Random sequence generation (selection bias)                                                                   | Low risk of bias                                                                                                                                             | Central computer randomization    |
| Allocation concealment (selection bias)                                                                       | Low risk of bias                                                                                                                                             | Central computer randomization    |
| Blinding of participants and personnel (performance bias)                                                     | Low risk of bias                                                                                                                                             | Double blind                      |
| Blinding of outcome assessment (detection bias)<br><i>AF, RRT, digital ischemia, myocardial injury and VT</i> | Low risk of bias                                                                                                                                             | Double blind                      |
| Blinding of outcome assessment (detection bias)<br><i>Mortality, Stroke, LOS</i>                              | Low risk of bias                                                                                                                                             | Double blind, objective outcomes  |
| Incomplete outcome data (attrition bias)<br><i>All outcomes</i>                                               | High Risk of bias                                                                                                                                            | 2/19 lost to follow up in group 1 |
| Selective reporting (reporting bias)<br><i>All outcomes</i>                                                   | Low risk of bias                                                                                                                                             | Consistent with protocol          |
| Other bias                                                                                                    | Low risk of bias                                                                                                                                             | None stated                       |

**Svoboda 2012<sup>25</sup>**

|                                                                                                               |                                                                                                                   |                                                        |
|---------------------------------------------------------------------------------------------------------------|-------------------------------------------------------------------------------------------------------------------|--------------------------------------------------------|
| Methods                                                                                                       | Single-centre open-label randomized controlled study at a hospital in the Czech Republic                          |                                                        |
| Participants                                                                                                  | Adult participants with septic shock<br>Mean age = 73 years, 61% male, 24% lung infection, SOFA score = 18 (N=32) |                                                        |
| Interventions                                                                                                 | Terlipressin 4 mg/24 h for 72 h<br>versus<br>Norepinephrine as needed                                             |                                                        |
| Open-label Catecholamines Permitted                                                                           | Yes                                                                                                               |                                                        |
| Outcomes Reported in Manuscript                                                                               | Mortality (e.g. 4 days, 28 days), other serious adverse events (not specified)                                    |                                                        |
| Outcomes Clarified by Contacting Authors                                                                      | Atrial Fibrillation, Ventricular Arrhythmias, Myocardial Injury, Stroke, Limb Ischemia                            |                                                        |
| Potential Conflicts                                                                                           | Funding source: grant of IGA MZ CR NR 9284-3. Declarations of interest: None stated.                              |                                                        |
| Notes                                                                                                         | N/A                                                                                                               |                                                        |
| <b>Risk of bias</b>                                                                                           |                                                                                                                   |                                                        |
| <i>Bias domain</i>                                                                                            | <i>Authors' judgement</i>                                                                                         | <i>Support for judgement</i>                           |
| Random sequence generation (selection bias)                                                                   | Low risk of bias                                                                                                  | Computer-generated random treatment list               |
| Allocation concealment (selection bias)                                                                       | Low risk of bias                                                                                                  | Sequentially numbered opaque sealed envelopes          |
| Blinding of participants and personnel (performance bias)                                                     | High risk of bias                                                                                                 | Open label                                             |
| Blinding of outcome assessment (detection bias)<br><i>AF, RRT, digital ischemia, myocardial injury and VT</i> | High risk of bias                                                                                                 | Open label                                             |
| Blinding of outcome assessment (detection bias)<br><i>Mortality, Stroke, LOS</i>                              | Low risk of bias                                                                                                  | Objective outcomes                                     |
| Incomplete outcome data (attrition bias)<br><i>All outcomes</i>                                               | Likely high risk of bias                                                                                          | Two patients who died were excluded post randomization |
| Selective reporting (reporting bias)<br><i>All outcomes</i>                                                   | Likely low risk of bias                                                                                           | No protocol but expected outcomes                      |
| Other bias                                                                                                    | Low risk of bias                                                                                                  | None detected                                          |

## eAppendix 7 – Characteristics of Important Excluded Studies

### Argenziano 1997<sup>26</sup>

|                     |                                                                                                                              |
|---------------------|------------------------------------------------------------------------------------------------------------------------------|
| Methods             | Single-centre blinded randomized controlled study at a hospital in the United States                                         |
| Participants        | Adult participants with congestive heart failure and vasodilatory shock<br>Mean age = 52 years (N=20)                        |
| Interventions       | Vasopressin at 0.1 U/min<br>versus<br>Placebo (normal saline)                                                                |
| Outcomes            | None of interest                                                                                                             |
| Potential Conflicts | Funding source: grant from the Saydman Trust to Dr. Landry.<br>Declarations of interest: not stated.<br>No relevant outcomes |
| Notes               | N/A                                                                                                                          |

**Elmenesy 2008<sup>27</sup>**

|                     |                                                                             |
|---------------------|-----------------------------------------------------------------------------|
| Methods             | Single-centre open-label randomized controlled study at a hospital in Egypt |
| Participants        | Adult participants with septic shock (N=40)                                 |
| Interventions       | Vasopressin<br>versus<br>Norepinephrine                                     |
| Outcomes            | None of interest                                                            |
| Potential Conflicts | Funding source: not stated. Declarations of interest: not stated.           |
| Notes               | Assessed abstract only – still attempting to obtain full text               |

**Lückner 2006<sup>28</sup>**

|                       |                                                                                                                                          |
|-----------------------|------------------------------------------------------------------------------------------------------------------------------------------|
| Methods               | Single-centre open-label randomized controlled study at a tertiary care university hospital in Austria                                   |
| Participants          | Adult participants with vasodilatory shock following cardiac or major surgery<br>Mean age = 69 years, 61% male, MODS score = 12.3 (N=18) |
| Interventions         | Pitressin (in addition to norepinephrine) at continuous rate of 4 IU/hour versus<br>Norepinephrine to maintain MAP above 65 mm Hg        |
| Outcomes              | None of interest                                                                                                                         |
| Protocol registration | Funding source: Grant from Aguetant Laboratories, Lyon, France, for one of the authors. Declarations of interest: None stated.           |
| Notes                 | N/A                                                                                                                                      |



**Morelli 2011<sup>29</sup>**

|                     |                                                                                                                      |
|---------------------|----------------------------------------------------------------------------------------------------------------------|
| Methods             | Single-centre blinded randomized controlled study at a tertiary care university hospital in Italy                    |
| Participants        | Adult participants with septic shock<br>Mean age = 67 years, 62% male, 55% lung infection, SAPS II score = 52 (N=60) |
| Interventions       | Vasopressin 0.04 U/min<br>versus<br>Placebo<br>versus<br>Terlipressin 1mcg/kg/hr                                     |
| Outcomes            | None of interest                                                                                                     |
| Potential Conflicts | Funding source: not reported. Declarations of interest: none reported.                                               |
| Notes               | N/A                                                                                                                  |

## eAppendix 8 – Characteristics of Ongoing Studies

### Small Doses of Pituitrin Versus Norepinephrine for the Management of Vasoplegic Syndrome in Patients After Cardiac Surgery

|               |                                                                                                                                                                                                                                                                                                                                                                                                                                                                                                                                                                                                                                                                                                                                                                                                                                                                                                         |
|---------------|---------------------------------------------------------------------------------------------------------------------------------------------------------------------------------------------------------------------------------------------------------------------------------------------------------------------------------------------------------------------------------------------------------------------------------------------------------------------------------------------------------------------------------------------------------------------------------------------------------------------------------------------------------------------------------------------------------------------------------------------------------------------------------------------------------------------------------------------------------------------------------------------------------|
| Methods       | Allocation: Randomized Intervention<br>Model: Parallel Assignment                                                                                                                                                                                                                                                                                                                                                                                                                                                                                                                                                                                                                                                                                                                                                                                                                                       |
| Participants  | Patients diagnosed as vasoplegic syndrome (defined as mean arterial pressure less than 65 mmHg resistant to fluid challenge and cardiac index greater than 2.2 L/min · m <sup>2</sup> ) within 24 hours after cardiac surgery.                                                                                                                                                                                                                                                                                                                                                                                                                                                                                                                                                                                                                                                                          |
| Interventions | <b>Experimental:</b> Pituitrin arm<br>To begin with 0.02 U/min to maintain mean arterial pressure(MAP) higher than 65 mmHg.<br><br><b>Experimental:</b> Norepinephrine arm<br>To begin with 0.04 µg/kg.min to maintain mean arterial pressure(MAP) higher than 65 mmHg.                                                                                                                                                                                                                                                                                                                                                                                                                                                                                                                                                                                                                                 |
| Outcomes      | <b>Primary Outcome Measures:</b><br>Rate of in-hospital acute renal injury [ Time Frame: 30 days ]<br><br><b>Secondary Outcome Measures:</b><br>In-hospital mortality [Time Frame: 30 days ] All-cause mortality<br>Rate of new arrhythmias [ Time Frame: 30 days ] Rate of new arrhythmias after cardiac surgery<br>Hormone levels [Time Frame: 30 days ] Serum hormone levels after cardiac surgery, including vasopressin, catecholamine, corticosteroid and corticotropin-releasing hormone<br>Rate of ECMO or LVAD support [Time Frame: 30 days ] Receiving extracorporeal membrane oxygenation (ECMO) or left ventricle assist device (LVAD) support Duration on ventilator support [Time Frame: 30 days ] Duration on ventilator support after cardiac surgery ICU length of stay [Time Frame: 30 days ] ICU length of stay Hospital length of stay after cardiac surgery [Time Frame: 30 days ] |
| Notes         | NCT03106831                                                                                                                                                                                                                                                                                                                                                                                                                                                                                                                                                                                                                                                                                                                                                                                                                                                                                             |

**Vasoactive Drugs in Intensive Care Unit A Randomized Double Blind Trial of Vasoactive Drugs for the Management of Shock in the ICU**

|               |                                                                                                                                                                                                                                                                                                                                                                                                                                                                                                                                                                                                                                                                                             |
|---------------|---------------------------------------------------------------------------------------------------------------------------------------------------------------------------------------------------------------------------------------------------------------------------------------------------------------------------------------------------------------------------------------------------------------------------------------------------------------------------------------------------------------------------------------------------------------------------------------------------------------------------------------------------------------------------------------------|
| Methods       | Randomized, Double Blind                                                                                                                                                                                                                                                                                                                                                                                                                                                                                                                                                                                                                                                                    |
| Participants  | Patients diagnosed as vasoplegic syndrome (defined as mean arterial Requirement for vasoactive drugs via a central venous catheter for the treatment of shock. Shock will be defined as mean arterial pressure less than 70 mmHg or systolic blood pressure less than 100 mmHg despite administration of at least 1000 mL of crystalloid or 500 mL of colloid, unless there is an elevation in the central venous pressure to > 12 mmHg or in the pulmonary artery occlusion pressure to > 14 mmHg coupled with signs of tissue hypoperfusion (e.g. altered mental state, mottled skin, urine output < 0.5 mL/kg body weight for one hour, or a serum lactate level of > 2 mmol per liter). |
| Interventions | Drug: Epinephrine<br>Drug: Norepinephrine<br>Drug: Phenylephrine<br>Drug: Vasopressin                                                                                                                                                                                                                                                                                                                                                                                                                                                                                                                                                                                                       |
| Outcomes      | <b>Primary Outcome</b><br>Hospital mortality [Time Frame: Six months]<br><br><b>Secondary Outcome(s)</b><br>Heart rate [Time Frame: Six months] Incidence of tachydysrhythmia [Time Frame: Six months]                                                                                                                                                                                                                                                                                                                                                                                                                                                                                      |
| Notes         | NCT02118467                                                                                                                                                                                                                                                                                                                                                                                                                                                                                                                                                                                                                                                                                 |

**Infusion of low dose of vasopressin versus phenylephrine for prevention of cardiopulmonary bypass induced vasoplegic syndrome in patients undergoing coronary artery bypass grafting surgery**

|               |                                                                                                                                                                                                                                                                                                                                                                                                                                                                                                                                                                                                                                                                                                                    |
|---------------|--------------------------------------------------------------------------------------------------------------------------------------------------------------------------------------------------------------------------------------------------------------------------------------------------------------------------------------------------------------------------------------------------------------------------------------------------------------------------------------------------------------------------------------------------------------------------------------------------------------------------------------------------------------------------------------------------------------------|
| Methods       | Randomized, Double Blind                                                                                                                                                                                                                                                                                                                                                                                                                                                                                                                                                                                                                                                                                           |
| Participants  | Patients 18 up to 70 years olds who are candidate for elective cardiac surgery using cardiopulmonary bypass                                                                                                                                                                                                                                                                                                                                                                                                                                                                                                                                                                                                        |
| Interventions | <p><b>Intervention 1:</b> Starting infusion of vasopressin (Exir pharmaceutical co. Iran) 0.1 IU/min with starting of cardiopulmonary bypass and continuing it up to 4 hours after weaning from cardiopulmonary bypass.</p> <p><b>Intervention 2:</b> Starting infusion of phenylephrine (West-ward Pharmaceutical Corp. USA) 0.1 µg/kg/min (prepared as 5 mg in 50 ml normal saline) with starting of cardiopulmonary bypass and continuing it up to 4 hours after weaning from cardiopulmonary bypass..</p> <p><b>Intervention 3:</b> Placebo group: Starting NaCl 0.9% Infusion (2 ml/h) with starting of cardiopulmonary bypass and continuing it up to 4 hours after weaning from cardiopulmonary bypass.</p> |
| Outcomes      | <p><b>Primary Outcome(s)</b> severity of post operative vasoplegic shock. Timepoint: post cardiopulmonary bypass and post operative period. Method of measurement: Needs to vasoactive drugs</p> <p><b>Secondary Outcome(s)</b> Post operative complications. Timepoint: Post operatively in intensive care unit. Method of measurement: Clinical evaluation</p>                                                                                                                                                                                                                                                                                                                                                   |
| Notes         | ICRT201408201127N2                                                                                                                                                                                                                                                                                                                                                                                                                                                                                                                                                                                                                                                                                                 |

*AF = Atrial Fibrillation; ICU = Intensive Care Unit; LOS = Length of Stay; RRT = Renal Replacement Therapy; VT = Ventricular Arrhythmia*

**eAppendix 9 – Risk of Bias Graphs: Review Authors’ Judgments About Each Risk of Bias Item Presented as Percentages Across All 23 Randomized Trials**

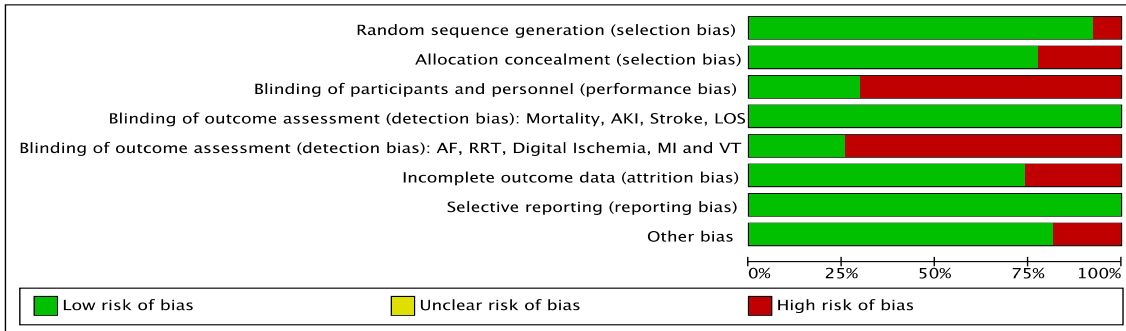

**Footnote**

The X axis denotes the % of studies deemed to be at high or low risk of bias in this domain.

AF = Atrial Fibrillation; AKI = Acute Kidney Injury; LOS = Length of Stay; MI = Myocardial Injury; RRT = Requirement for Renal Replacement Therapy; VT = Ventricular Arrhythmia

## eAppendix 10 – Risk of Bias Summary: Review Authors’ Judgments About Each Risk of Bias Item for Each Included Study

|                                   | Random sequence generation (selection bias) | Allocation concealment (selection bias) | Blinding of participants and personnel (performance bias) | Blinding of outcome assessment (detection bias): Mortality, Acute Kidney Injury, Stroke, Length of Stay | Blinding of outcome assessment (detection bias): Atrial Fibrillation, Renal Replacement Therapy, Digital Ischemia, Myocardial Injury and Ventricular Arrhythmia | Incomplete outcome data (attrition bias) | Selective reporting (reporting bias) | Other bias |
|-----------------------------------|---------------------------------------------|-----------------------------------------|-----------------------------------------------------------|---------------------------------------------------------------------------------------------------------|-----------------------------------------------------------------------------------------------------------------------------------------------------------------|------------------------------------------|--------------------------------------|------------|
| Abdullah 2012 [3]                 | +                                           | +                                       | +                                                         | +                                                                                                       | +                                                                                                                                                               | +                                        | +                                    | +          |
| Acevedo 2009 [4]                  | +                                           | +                                       | +                                                         | +                                                                                                       | +                                                                                                                                                               | +                                        | +                                    | +          |
| Albanese 2005 [5]                 | +                                           | +                                       | +                                                         | +                                                                                                       | +                                                                                                                                                               | +                                        | +                                    | +          |
| Barzegar 2016 [6]                 | +                                           | +                                       | +                                                         | +                                                                                                       | +                                                                                                                                                               | +                                        | +                                    | +          |
| Capoletto 2017 [7]                | +                                           | +                                       | +                                                         | +                                                                                                       | +                                                                                                                                                               | +                                        | +                                    | +          |
| Chen 2017 [8]                     | +                                           | +                                       | +                                                         | +                                                                                                       | +                                                                                                                                                               | +                                        | +                                    | +          |
| Choudhury 2016 [9]                | +                                           | +                                       | +                                                         | +                                                                                                       | +                                                                                                                                                               | +                                        | +                                    | +          |
| Clem 2016 [10]                    | +                                           | +                                       | +                                                         | +                                                                                                       | +                                                                                                                                                               | +                                        | +                                    | +          |
| Dünser 2003 [11]                  | +                                           | +                                       | +                                                         | +                                                                                                       | +                                                                                                                                                               | +                                        | +                                    | +          |
| Dünser 2003 - Postcardiotomy [11] | +                                           | +                                       | +                                                         | +                                                                                                       | +                                                                                                                                                               | +                                        | +                                    | +          |
| Dünser 2003 - Sepsis [11]         | +                                           | +                                       | +                                                         | +                                                                                                       | +                                                                                                                                                               | +                                        | +                                    | +          |
| Fonseca Ruiz 2013 [12]            | +                                           | +                                       | +                                                         | +                                                                                                       | +                                                                                                                                                               | +                                        | +                                    | +          |
| Gordon 2016 [13]                  | +                                           | +                                       | +                                                         | +                                                                                                       | +                                                                                                                                                               | +                                        | +                                    | +          |
| Hajjar 2017 [14]                  | +                                           | +                                       | +                                                         | +                                                                                                       | +                                                                                                                                                               | +                                        | +                                    | +          |
| Han 2012 [15]                     | +                                           | +                                       | +                                                         | +                                                                                                       | +                                                                                                                                                               | +                                        | +                                    | +          |
| Hua 2013 [16]                     | +                                           | +                                       | +                                                         | +                                                                                                       | +                                                                                                                                                               | +                                        | +                                    | +          |
| Lauzier 2006 [17]                 | +                                           | +                                       | +                                                         | +                                                                                                       | +                                                                                                                                                               | +                                        | +                                    | +          |
| Malay 1999 [18]                   | +                                           | +                                       | +                                                         | +                                                                                                       | +                                                                                                                                                               | +                                        | +                                    | +          |
| Morelli 2009 [19]                 | +                                           | +                                       | +                                                         | +                                                                                                       | +                                                                                                                                                               | +                                        | +                                    | +          |
| Morelli 2009 - Terlipressin [19]  | +                                           | +                                       | +                                                         | +                                                                                                       | +                                                                                                                                                               | +                                        | +                                    | +          |
| Morelli 2009 - Vasopressin [19]   | +                                           | +                                       | +                                                         | +                                                                                                       | +                                                                                                                                                               | +                                        | +                                    | +          |
| Oliveira 2014 [20]                | +                                           | +                                       | +                                                         | +                                                                                                       | +                                                                                                                                                               | +                                        | +                                    | +          |
| Patel 2002 [21]                   | +                                           | +                                       | +                                                         | +                                                                                                       | +                                                                                                                                                               | +                                        | +                                    | +          |
| Prakash 2017 [22]                 | +                                           | +                                       | +                                                         | +                                                                                                       | +                                                                                                                                                               | +                                        | +                                    | +          |
| Russell 2008 [23]                 | +                                           | +                                       | +                                                         | +                                                                                                       | +                                                                                                                                                               | +                                        | +                                    | +          |
| Russell 2017 [24]                 | +                                           | +                                       | +                                                         | +                                                                                                       | +                                                                                                                                                               | +                                        | +                                    | +          |
| Svoboda 2012 [25]                 | +                                           | +                                       | +                                                         | +                                                                                                       | +                                                                                                                                                               | +                                        | +                                    | +          |

### Footnote

Green circle with “+” denotes low risk of bias in this domain;  
 Red circle with “-” denotes high risk of bias in this domain

# eAppendix 11 – Forest Plots for All Outcomes, Including Sensitivity Analyses

## Atrial Fibrillation – All Studies<sup>a,b</sup>

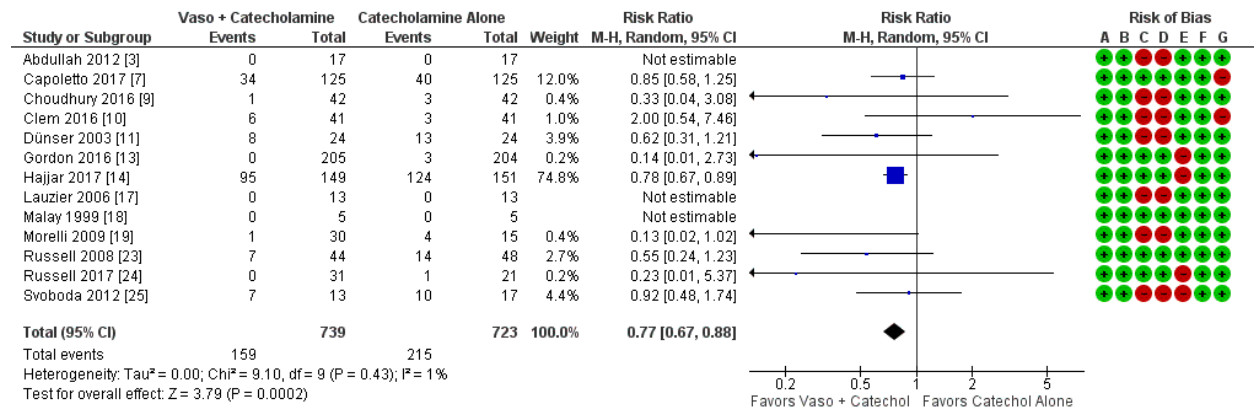

### Risk of bias legend

- (A) Random sequence generation (selection bias)
- (B) Allocation concealment (selection bias)
- (C) Blinding of participants and personnel (performance bias)
- (D) Blinding of outcome assessment (detection bias): Atrial Fibrillation, Renal Replacement Therapy, Digital Ischemia, Myocardial Injury and Ventricular Arrhythmia
- (E) Incomplete outcome data (attrition bias)
- (F) Selective reporting (reporting bias)
- (G) Other bias

## Atrial Fibrillation – Risk of Bias<sup>a,b</sup>

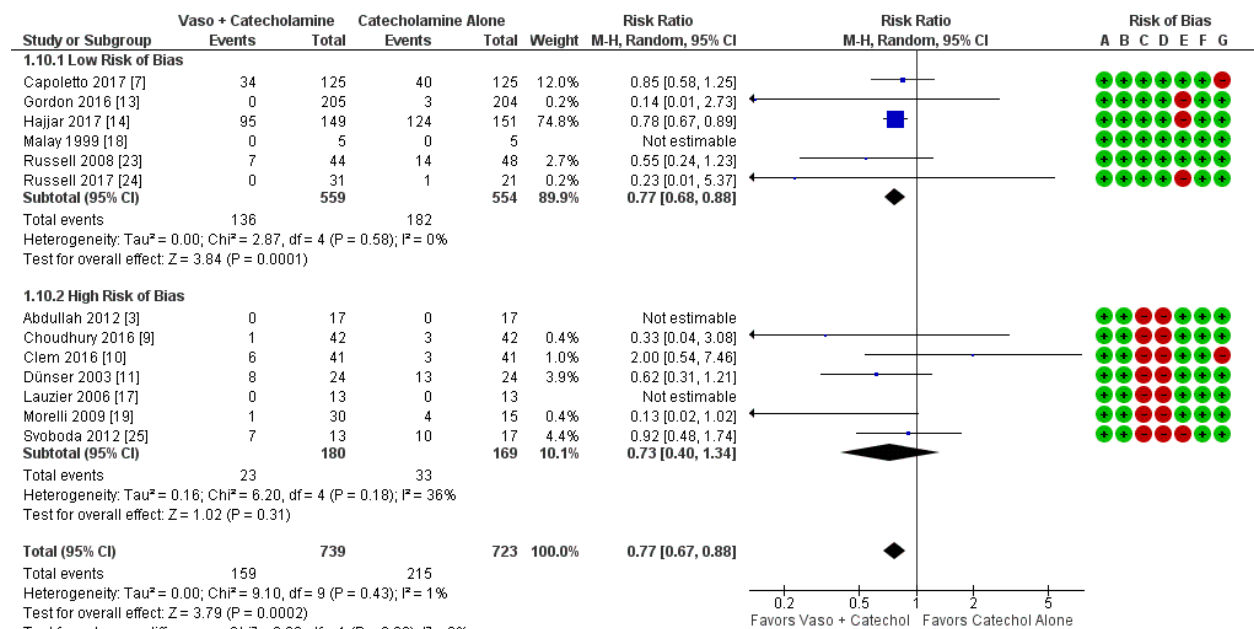

### Risk of bias legend

- (A) Random sequence generation (selection bias)
- (B) Allocation concealment (selection bias)
- (C) Blinding of participants and personnel (performance bias)
- (D) Blinding of outcome assessment (detection bias): Atrial Fibrillation, Renal Replacement Therapy, Digital Ischemia, Myocardial Injury and Ventricular Arrhythmia
- (E) Incomplete outcome data (attrition bias)
- (F) Selective reporting (reporting bias)
- (G) Other bias

# Atrial Fibrillation – Shock Etiology<sup>a,b,c</sup>

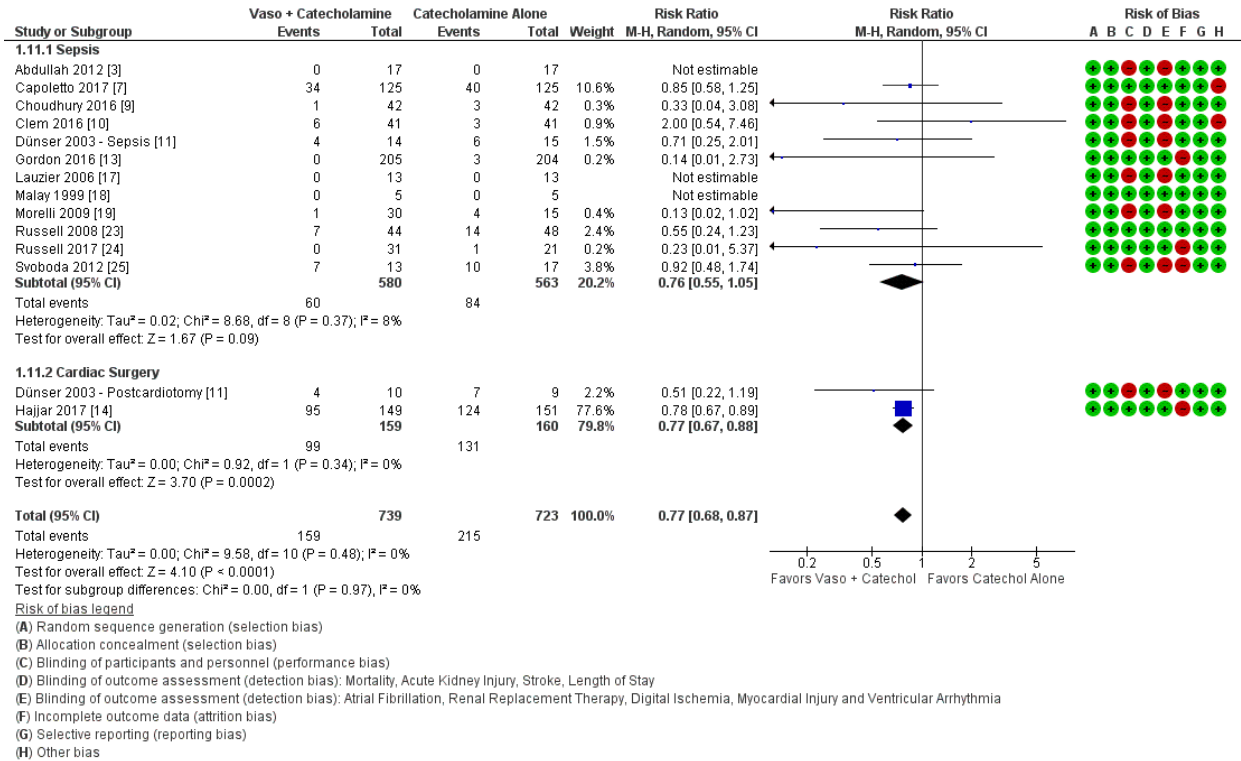

# Atrial Fibrillation – Vasopressin versus Analogs<sup>a,b,d</sup>

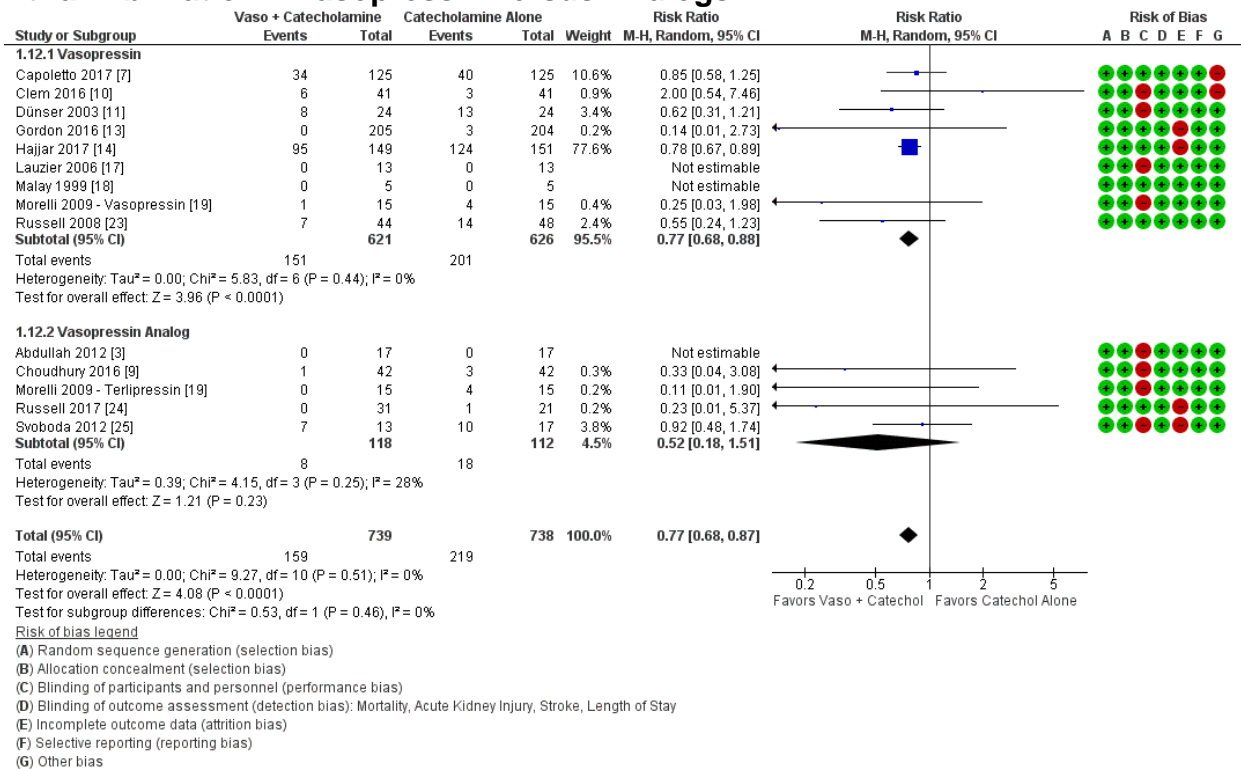



## Atrial Fibrillation – Analysis Using Fixed Effect Model<sup>a,b</sup>

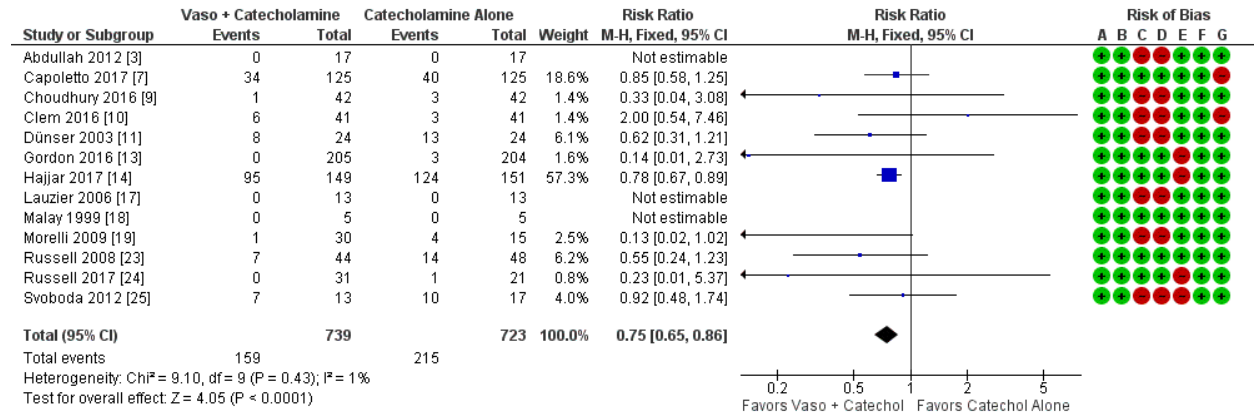

### Risk of bias legend

- (A) Random sequence generation (selection bias)
- (B) Allocation concealment (selection bias)
- (C) Blinding of participants and personnel (performance bias)
- (D) Blinding of outcome assessment (detection bias): Atrial Fibrillation, Renal Replacement Therapy, Digital Ischemia, Myocardial Injury and Ventricular Arrhythmia
- (E) Incomplete outcome data (attrition bias)
- (F) Selective reporting (reporting bias)
- (G) Other bias

## 28 or 30 Day Mortality – All Studies<sup>a,b</sup>

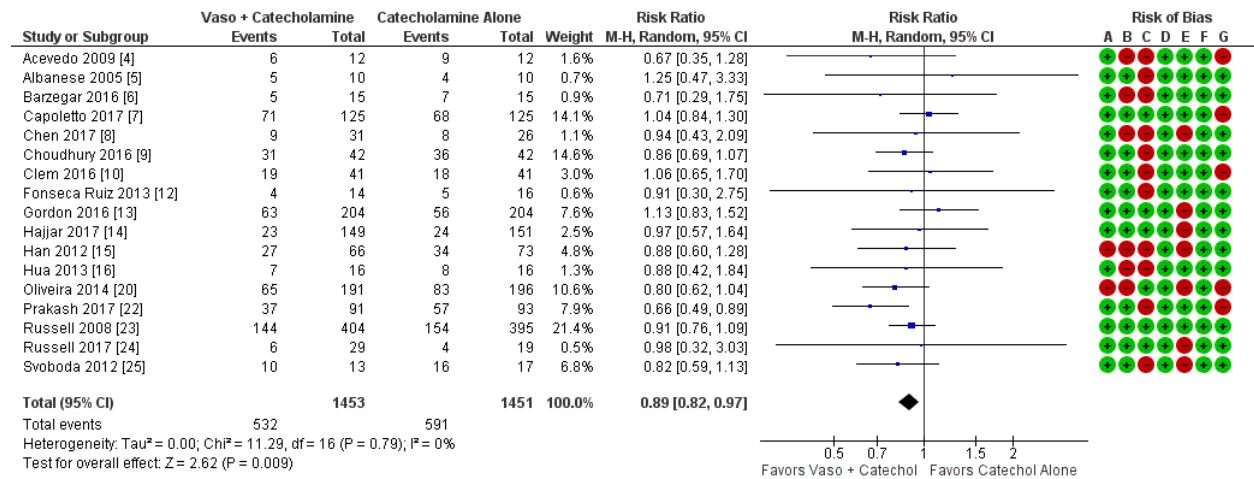

### Risk of bias legend

- (A) Random sequence generation (selection bias)
- (B) Allocation concealment (selection bias)
- (C) Blinding of participants and personnel (performance bias)
- (D) Blinding of outcome assessment (detection bias): Mortality, Acute Kidney Injury, Stroke, Length of Stay
- (E) Incomplete outcome data (attrition bias)
- (F) Selective reporting (reporting bias)
- (G) Other bias

## 28 or 30 Day Mortality – Risk of Bias<sup>a,b</sup>

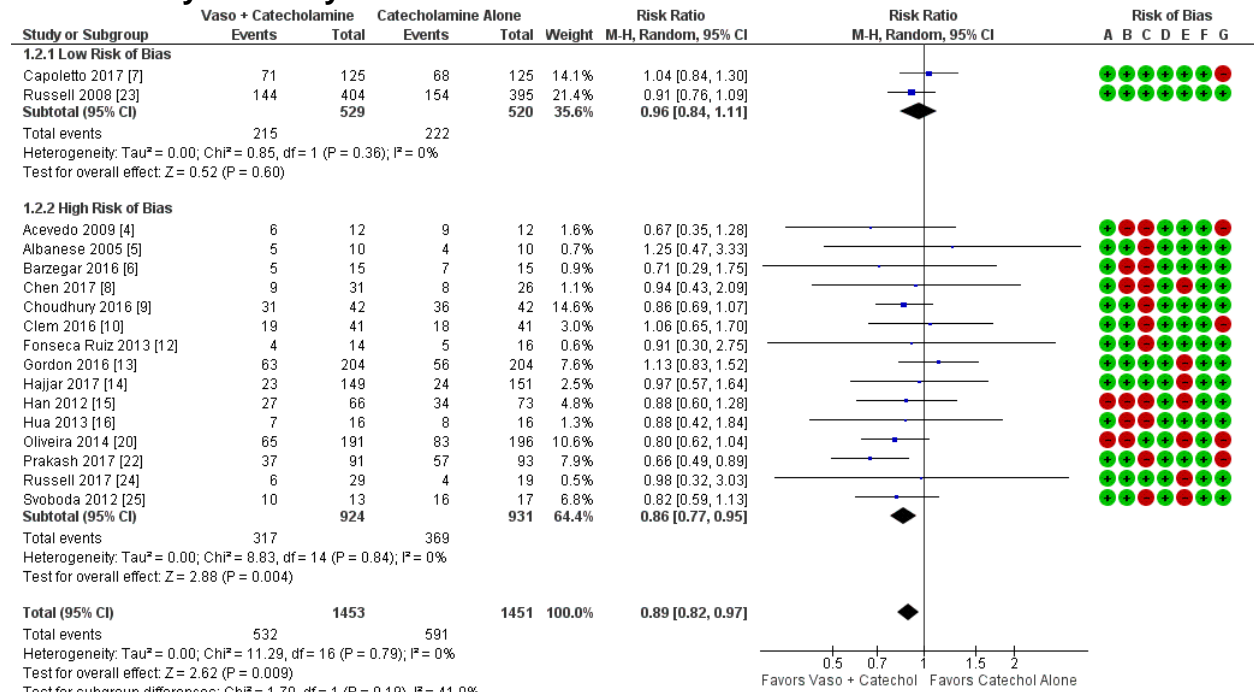

### Risk of bias legend

- (A) Random sequence generation (selection bias)
- (B) Allocation concealment (selection bias)
- (C) Blinding of participants and personnel (performance bias)
- (D) Blinding of outcome assessment (detection bias): Mortality, Acute Kidney Injury, Stroke, Length of Stay
- (E) Incomplete outcome data (attrition bias)
- (F) Selective reporting (reporting bias)
- (G) Other bias

## Mortality – 28 or 30 Day or ICU Mortality<sup>a,b,e</sup>

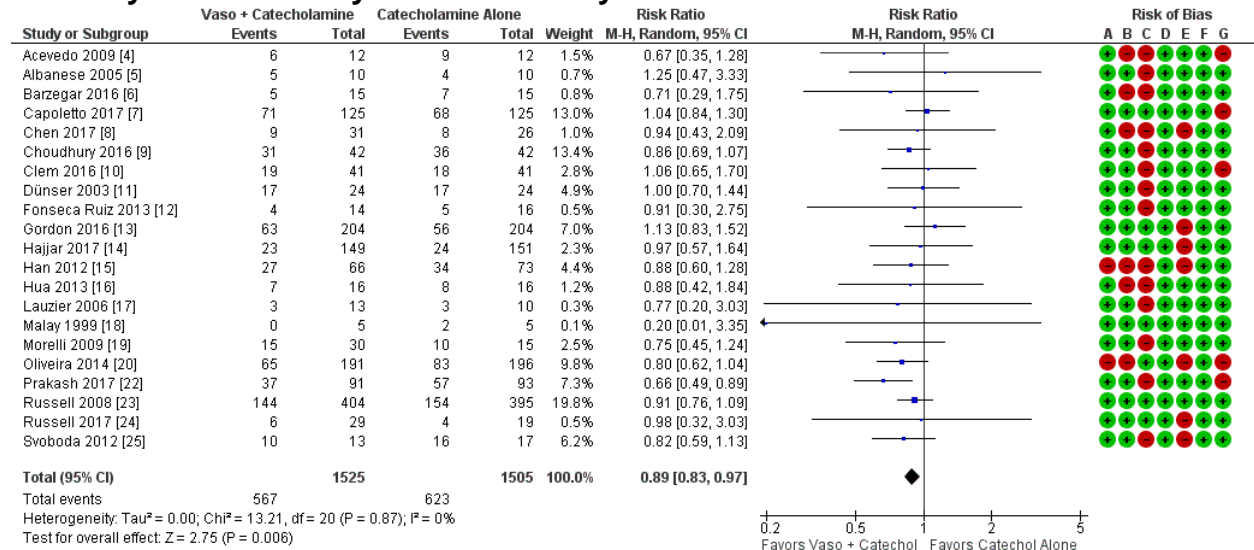

### Risk of bias legend

- (A) Random sequence generation (selection bias)
- (B) Allocation concealment (selection bias)
- (C) Blinding of participants and personnel (performance bias)
- (D) Blinding of outcome assessment (detection bias): Mortality, Acute Kidney Injury, Stroke, Length of Stay
- (E) Incomplete outcome data (attrition bias)
- (F) Selective reporting (reporting bias)
- (G) Other bias

## 28 or 30 Day Mortality – Full Text versus Abstract-only Publication<sup>a,b,f</sup>

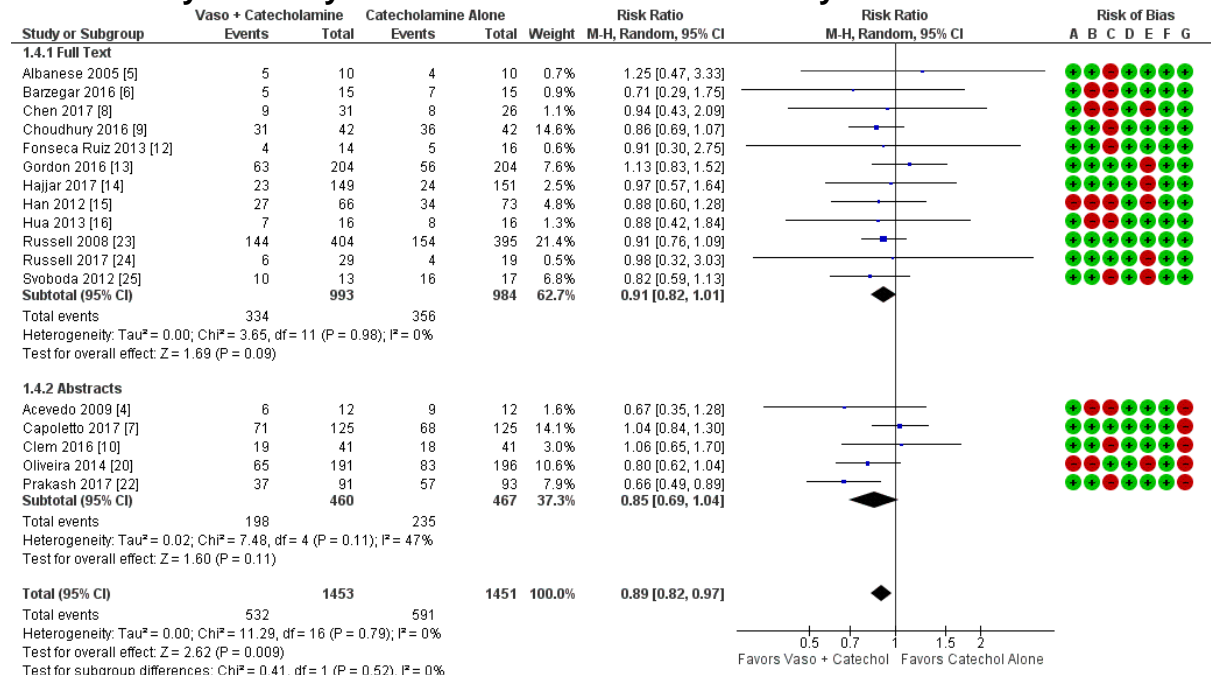

### Risk of bias legend

- (A) Random sequence generation (selection bias)
- (B) Allocation concealment (selection bias)
- (C) Blinding of participants and personnel (performance bias)
- (D) Blinding of outcome assessment (detection bias): Mortality, Acute Kidney Injury, Stroke, Length of Stay
- (E) Incomplete outcome data (attrition bias)
- (F) Selective reporting (reporting bias)
- (G) Other bias

## 28 or 30 Day Mortality – Shock Etiology<sup>a,b,c</sup>

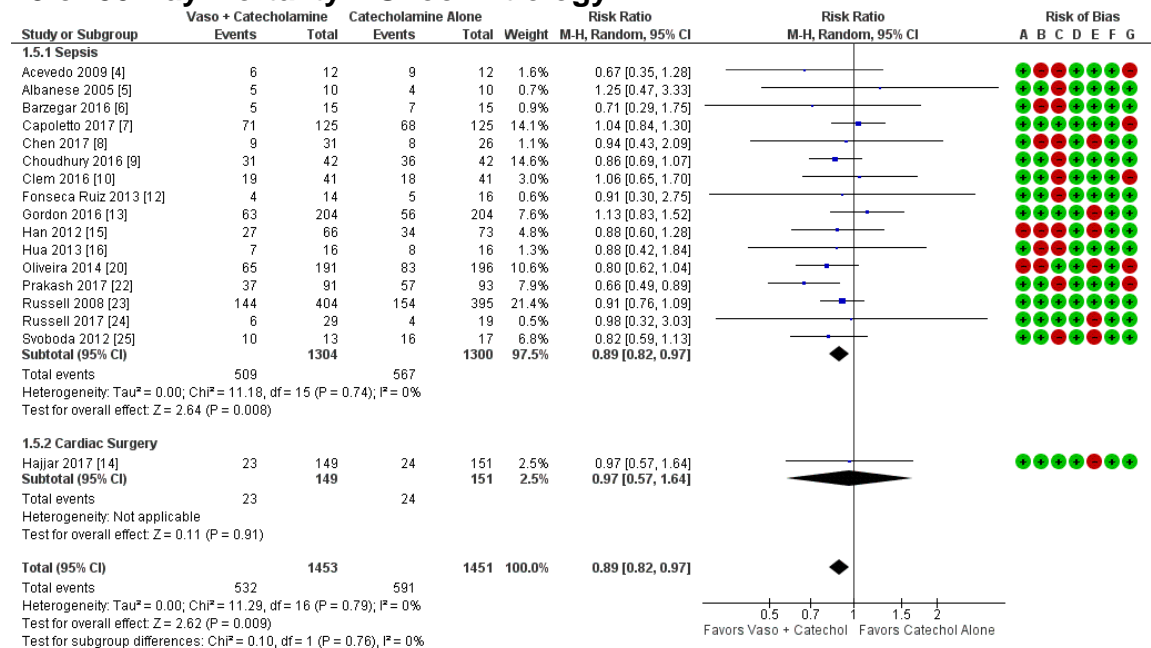

### Risk of bias legend

- (A) Random sequence generation (selection bias)
- (B) Allocation concealment (selection bias)
- (C) Blinding of participants and personnel (performance bias)
- (D) Blinding of outcome assessment (detection bias): Mortality, Acute Kidney Injury, Stroke, Length of Stay
- (E) Incomplete outcome data (attrition bias)
- (F) Selective reporting (reporting bias)
- (G) Other bias

## 28 or 30 Day Mortality – Vasopressin versus Analogs<sup>a,b,d</sup>

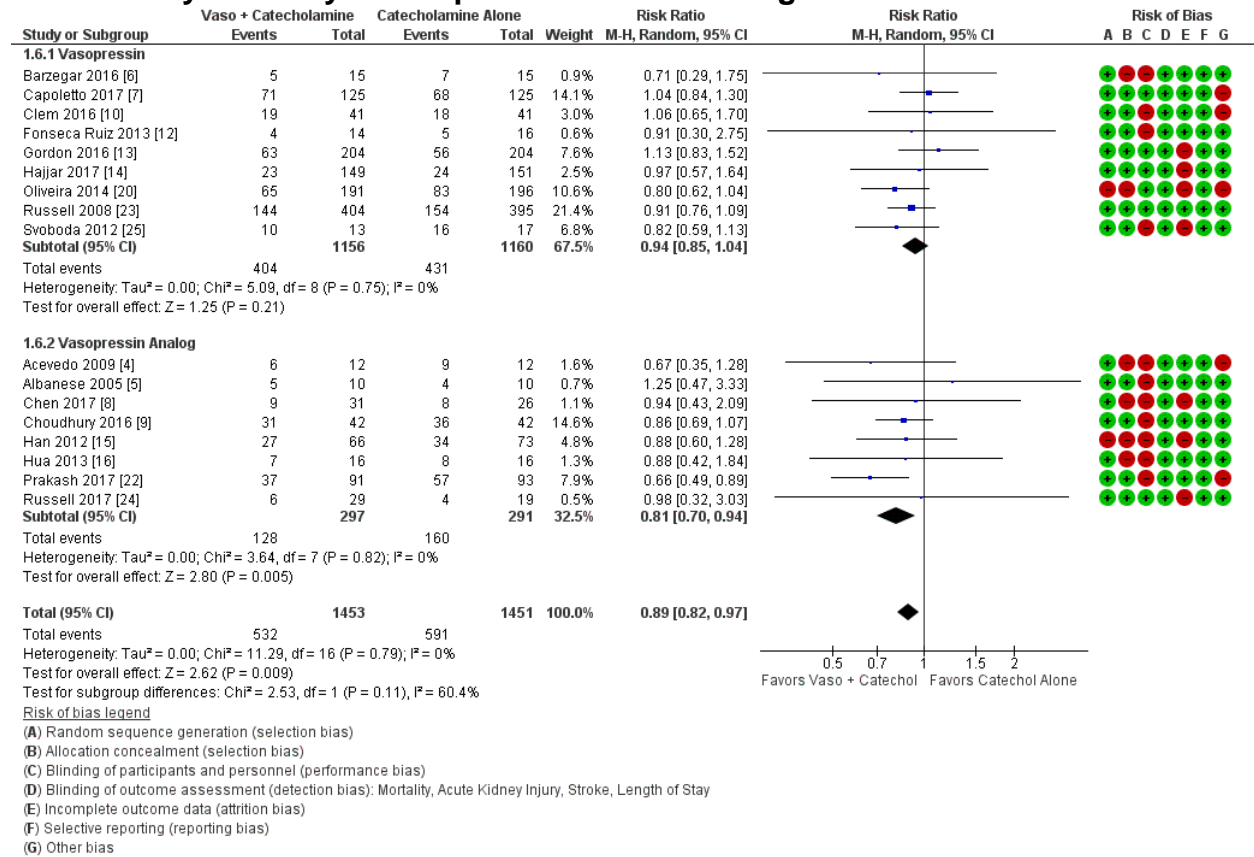

## Requirement for Renal Replacement Therapy – All Studies<sup>a,b</sup>

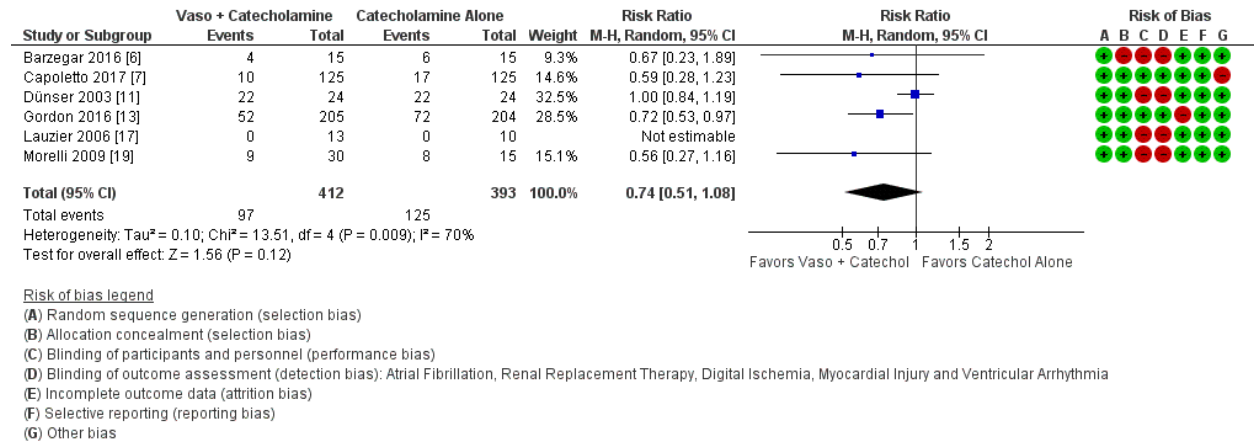



# Requirement for Renal Replacement Therapy – Vasopressin versus Analogs<sup>a,b,d</sup>

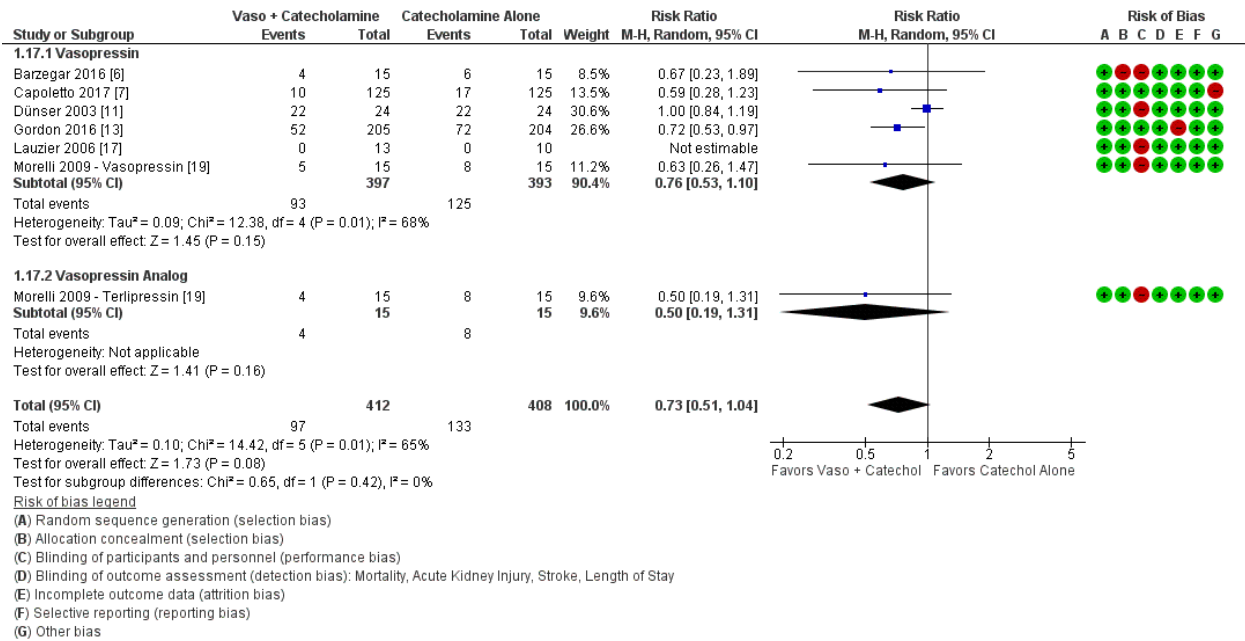

# Digital Ischemia – All Studies<sup>a,b</sup>

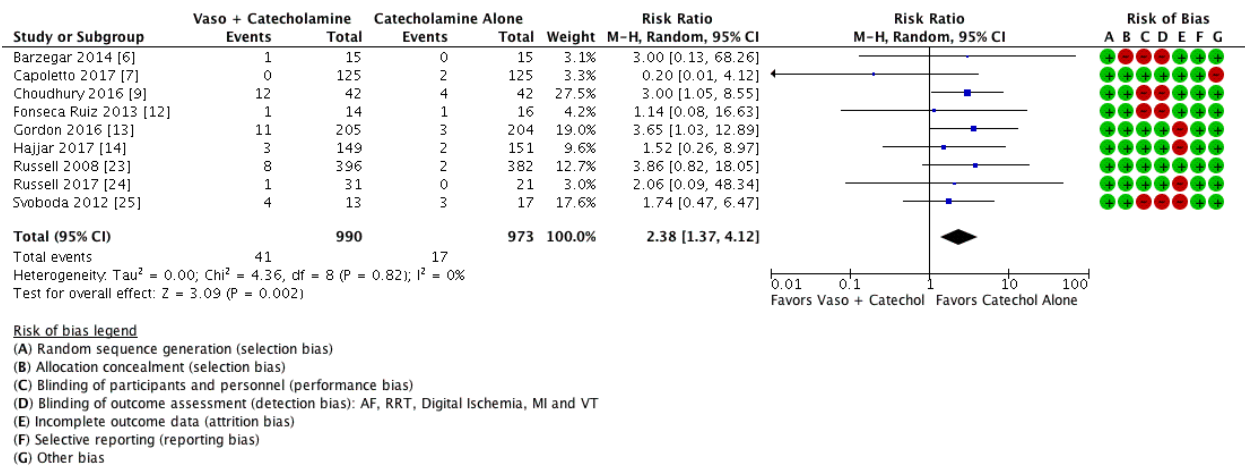

## Digital Ischemia – Risk of Bias<sup>a,b</sup>

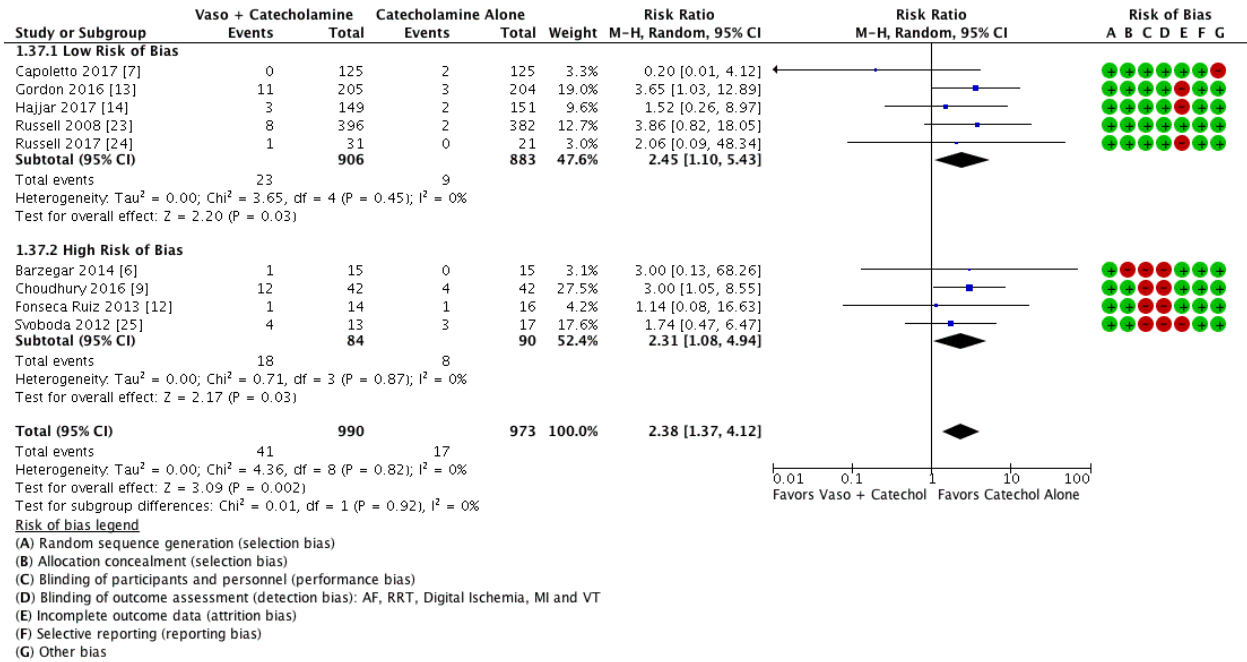

## Digital Ischemia – Defined as Digital Ischemia<sup>a,b,g</sup>

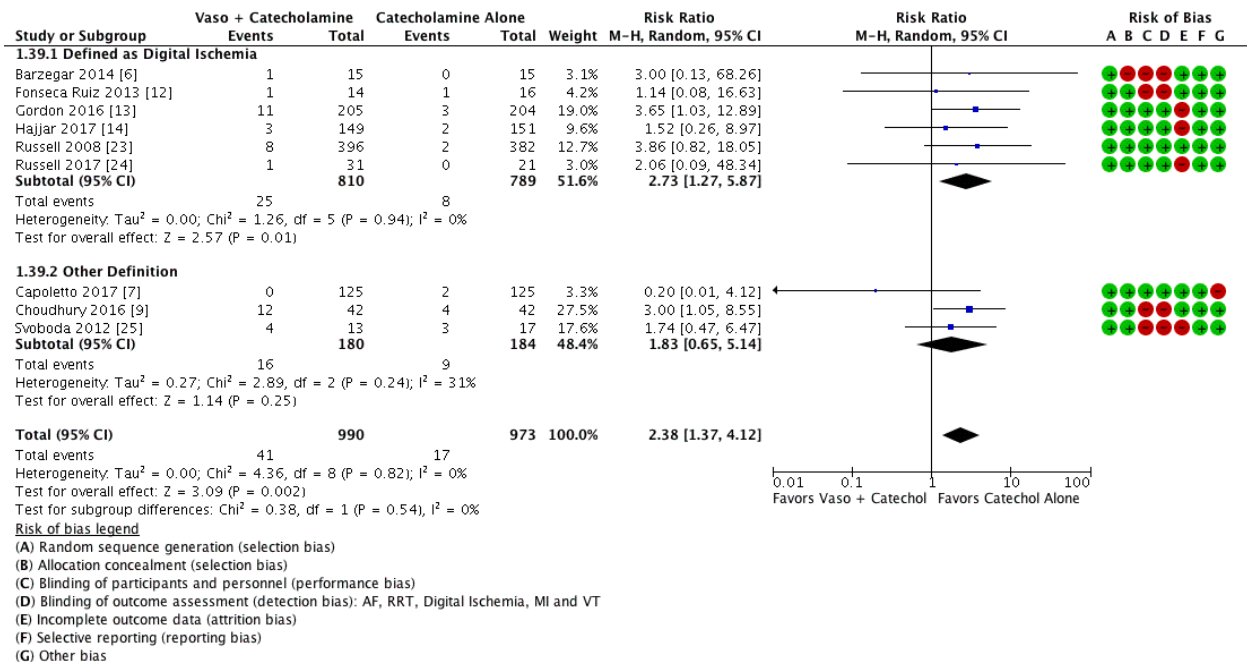

## Digital Ischemia – Vasopressin versus Analogs<sup>a,b</sup>

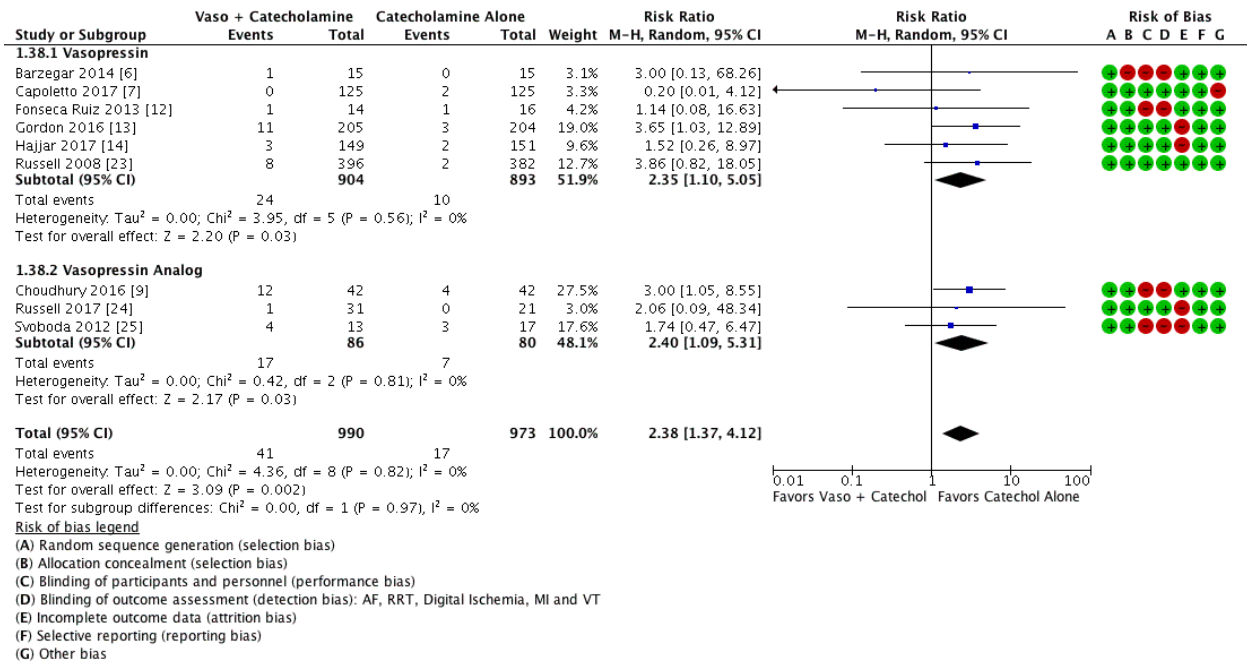

## Myocardial Injury – All Studies<sup>a,b</sup>

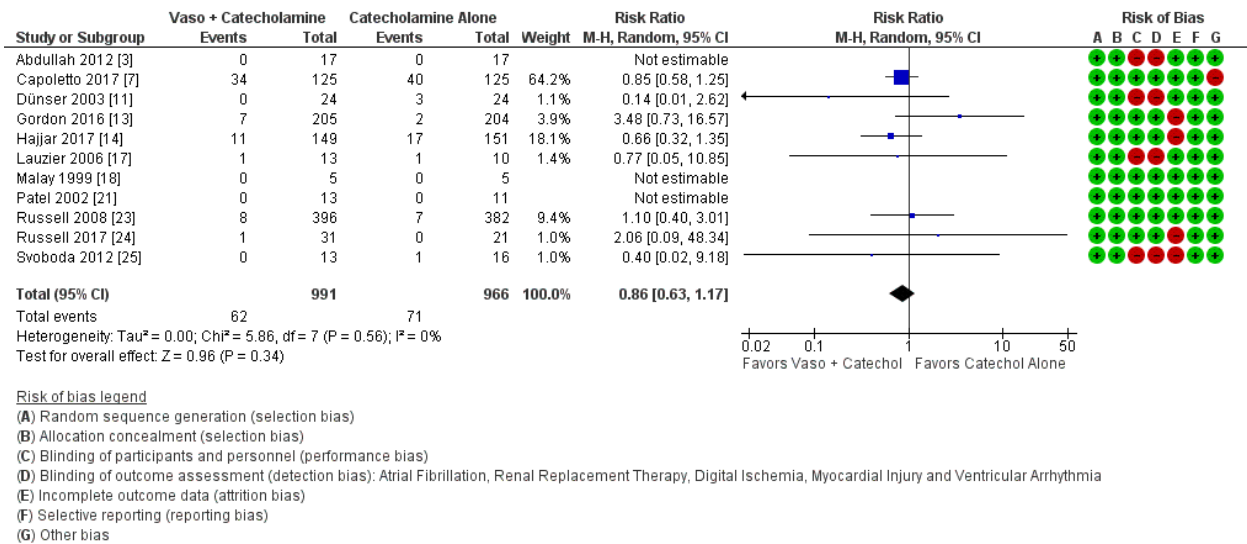



## Myocardial Injury – Risk of Bias<sup>a,b</sup>

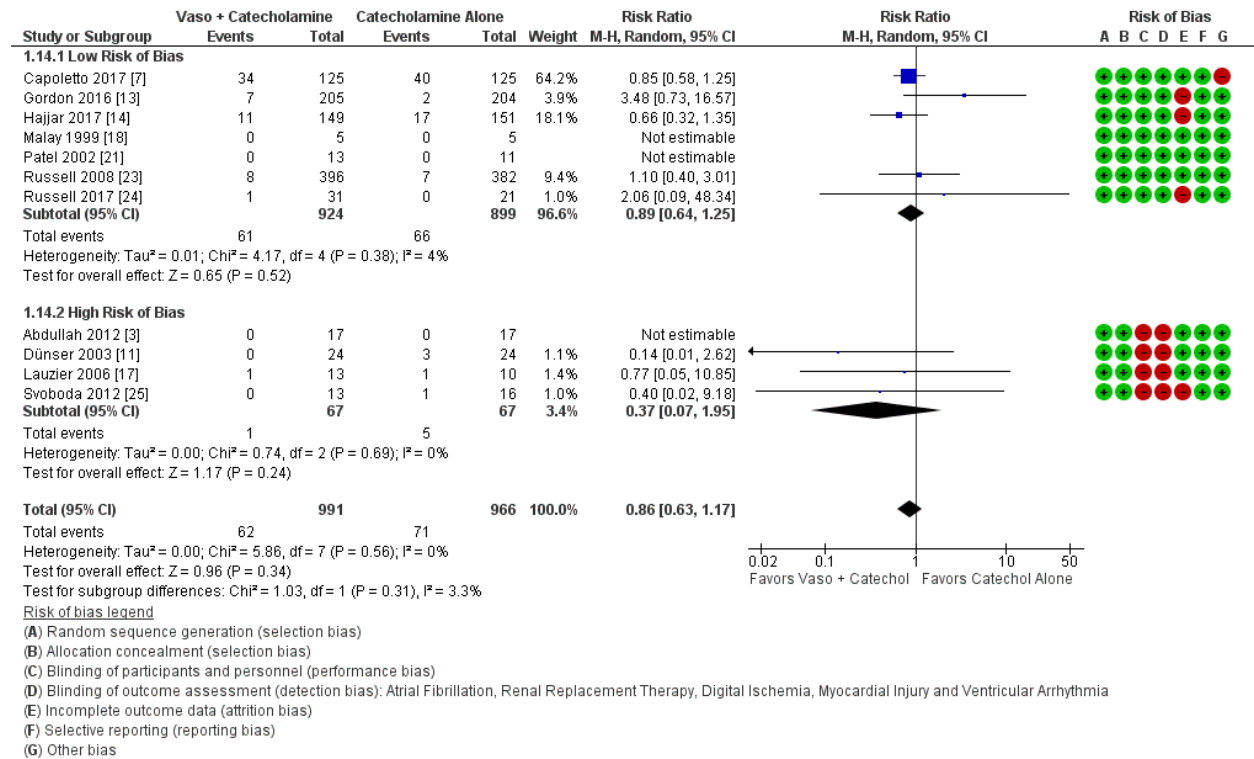

## Myocardial Injury – Shock Etiology<sup>a,b,c</sup>

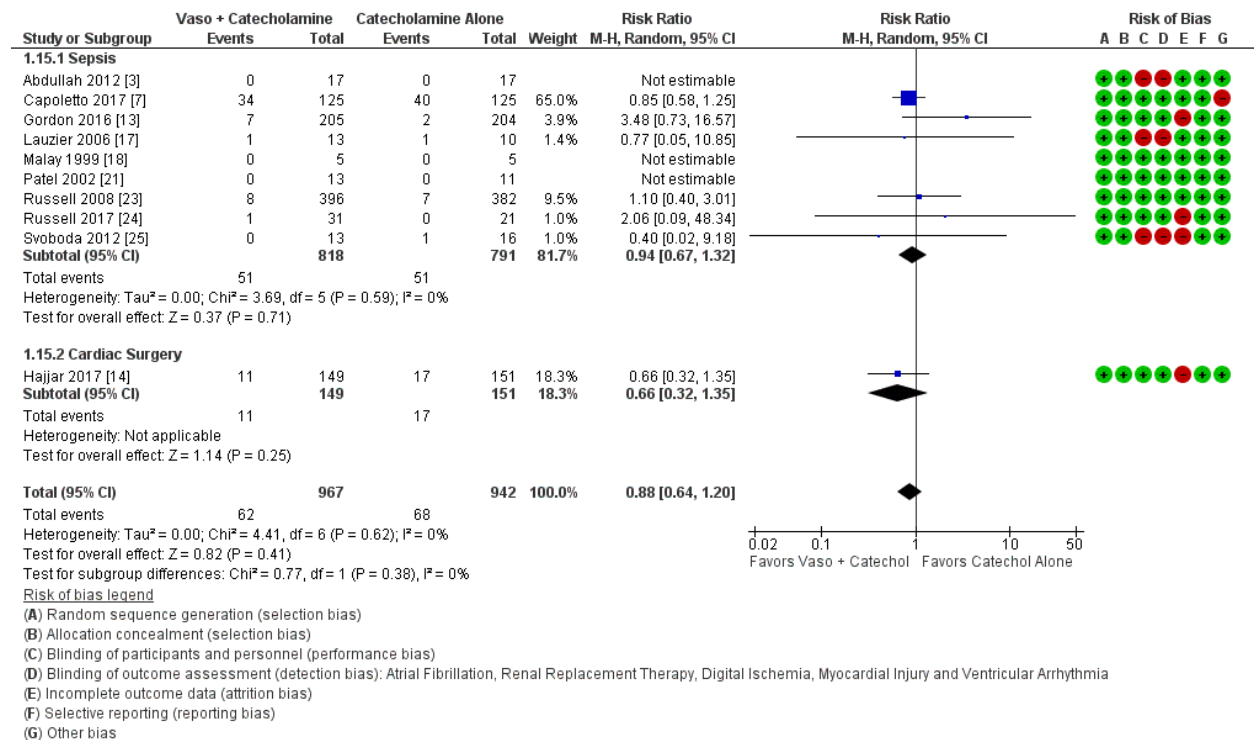

## Myocardial Injury – Vasopressin versus Analogs<sup>a,b,d</sup>

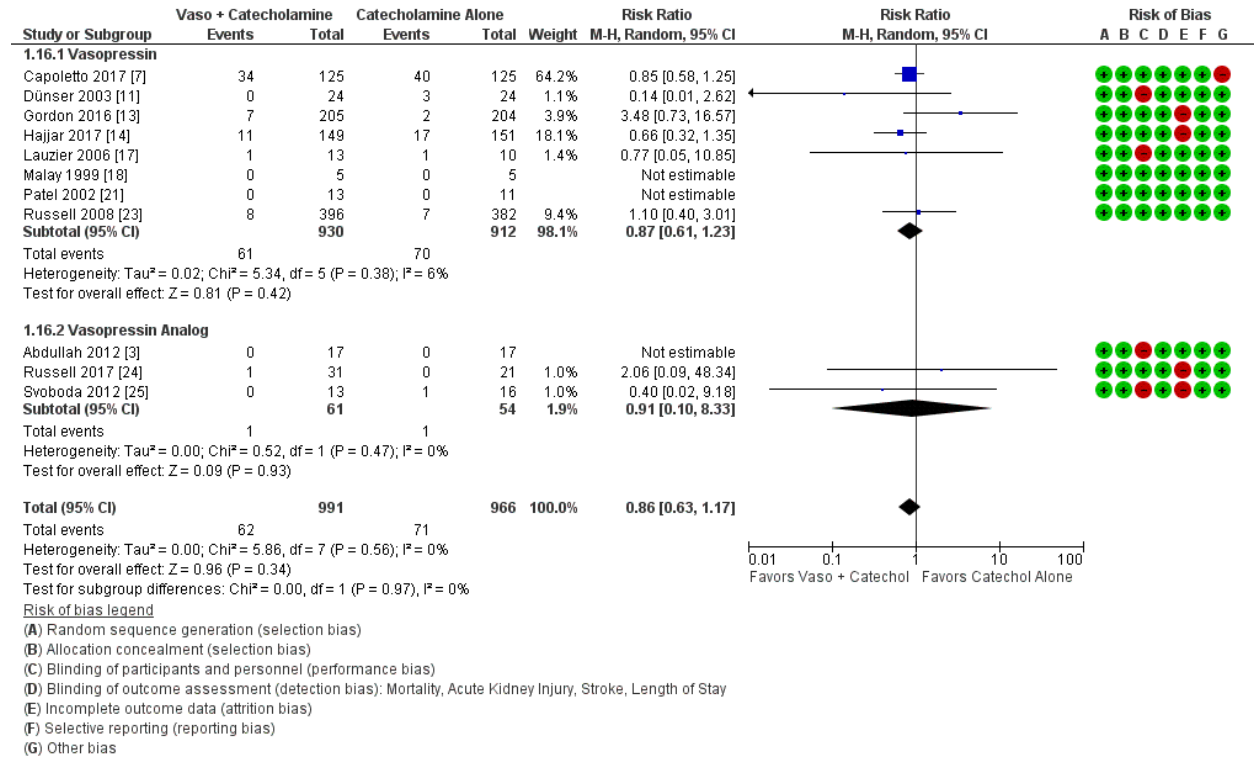

## Ventricular Arrhythmia – All Studies<sup>a,b</sup>

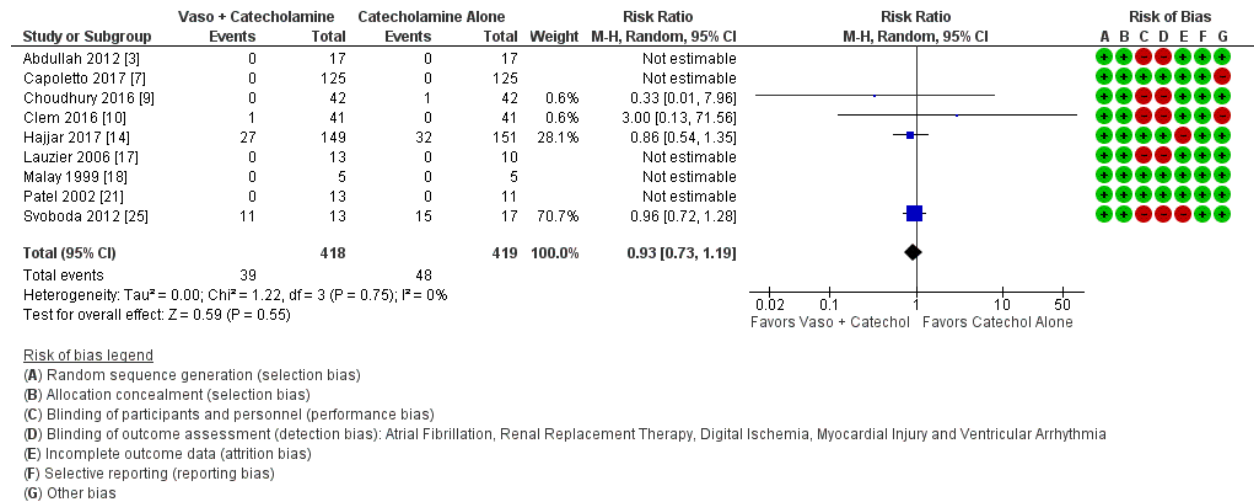

## Ventricular Arrhythmia – Risk of Bias<sup>a,b</sup>

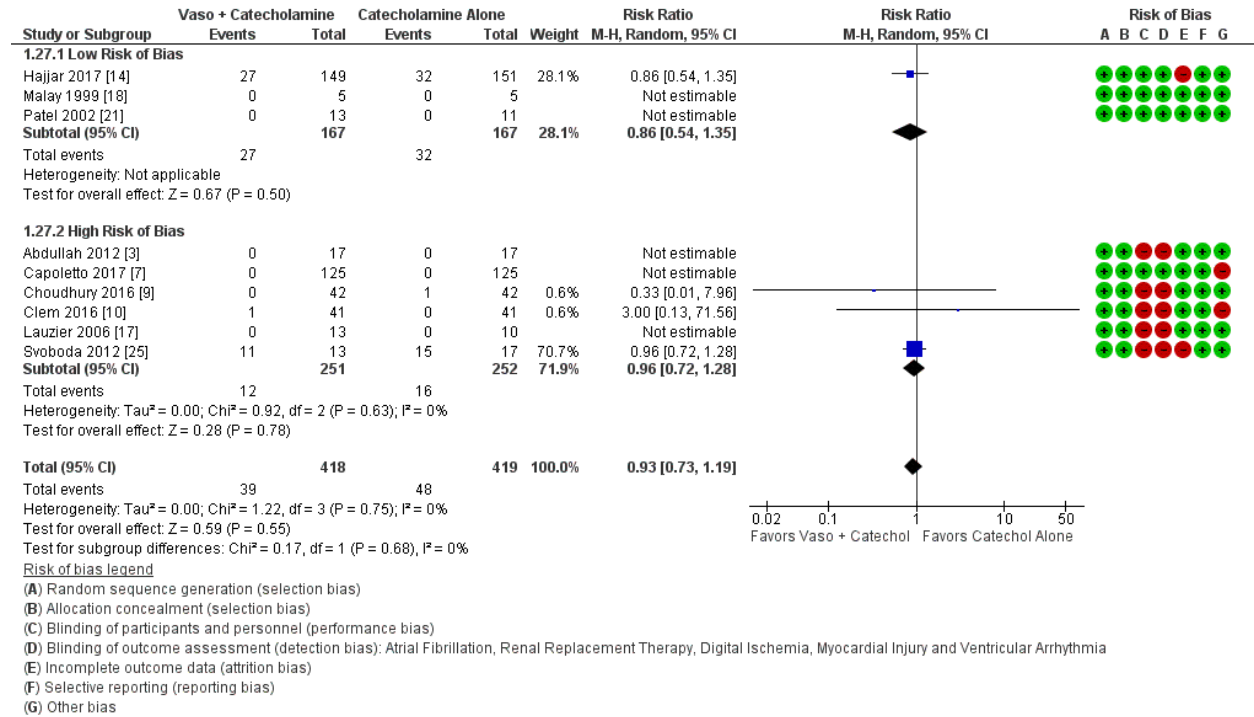

## Ventricular Arrhythmia – Vasopressin versus Analogs<sup>a,b,d</sup>

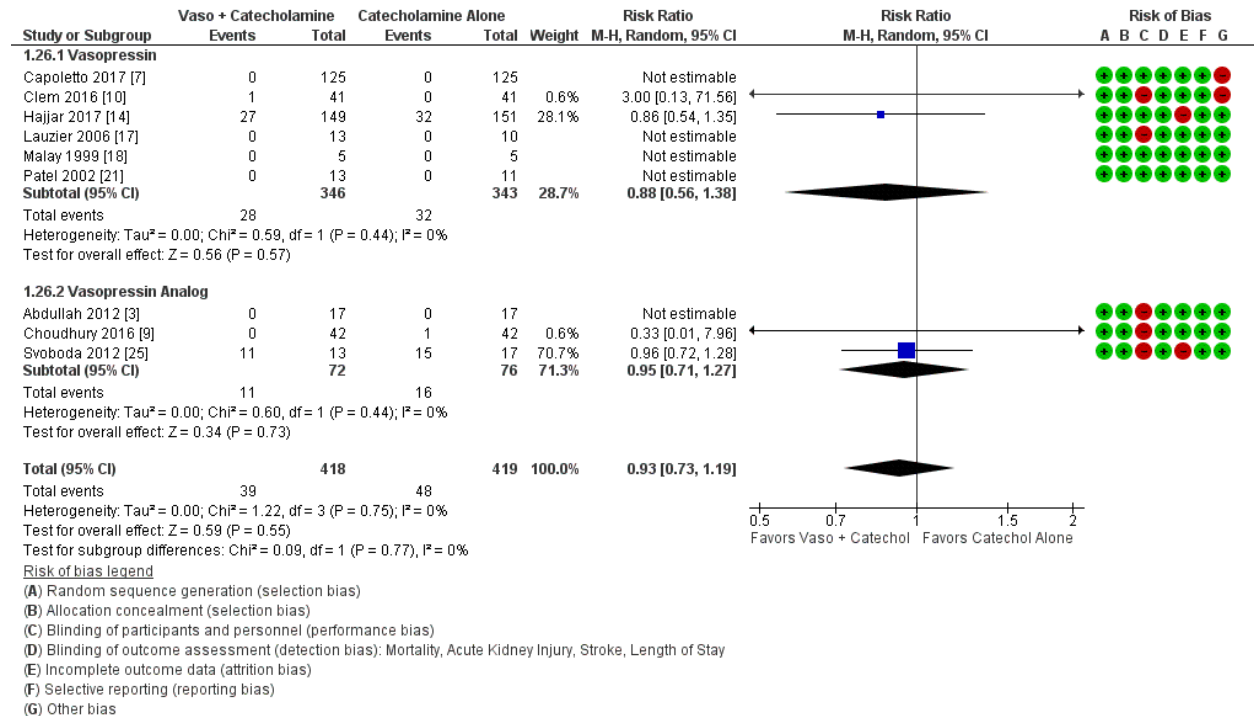



## Stroke – Vasopressin versus Analogs<sup>a,b,d</sup>

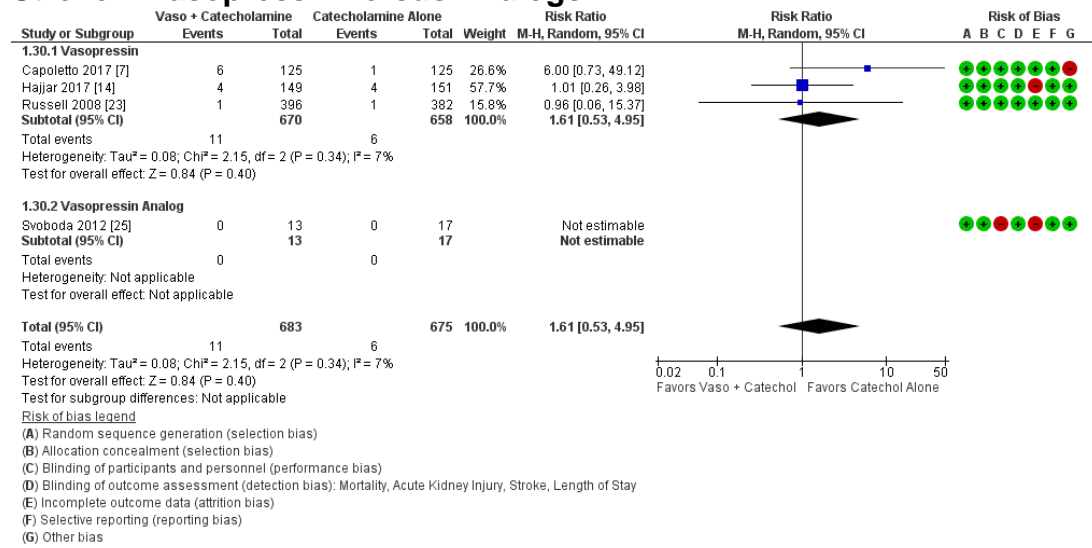

## Hospital Length of Stay – All Studies<sup>a,b</sup>

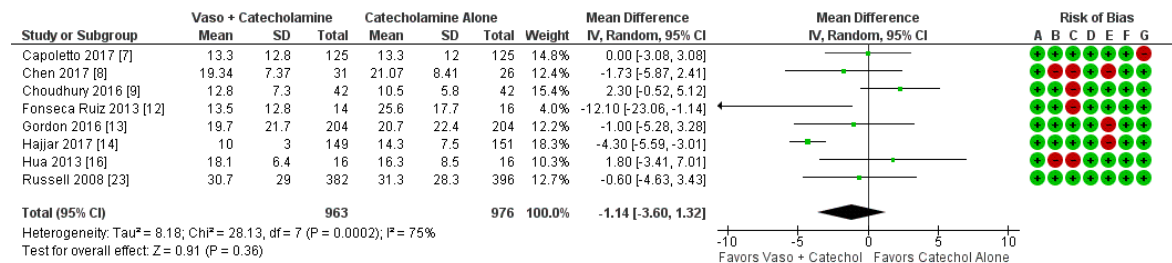

## Hospital Length of Stay – Risk of Bias<sup>a,b</sup>

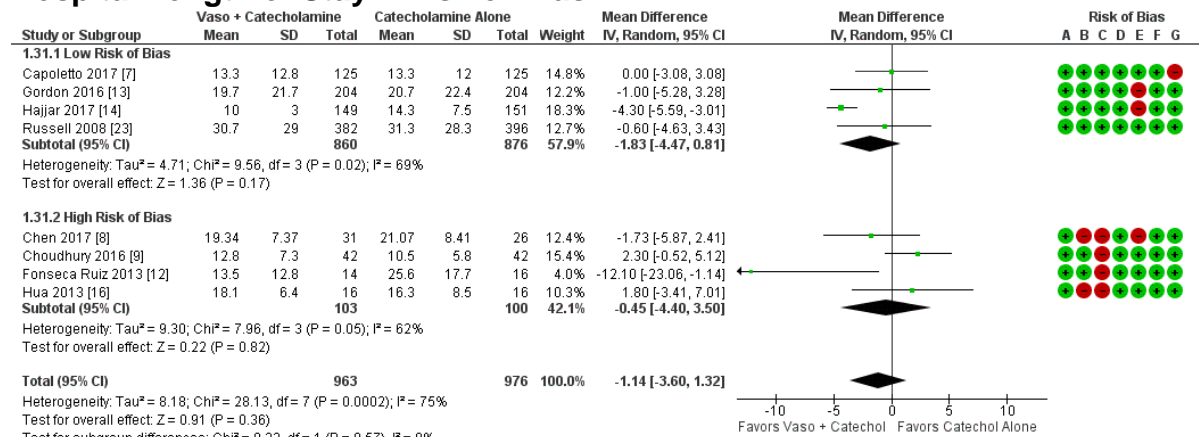

# Hospital Length of Stay – Vasopressin versus Analogs<sup>a,b,d</sup>

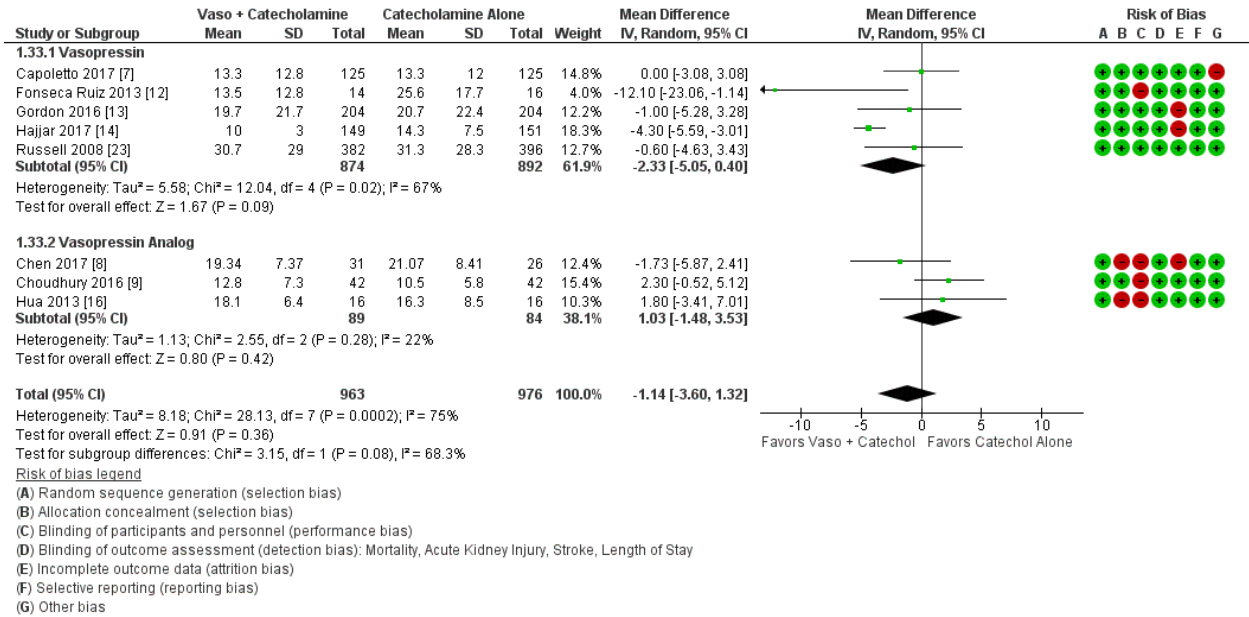

# ICU Length of Stay – All Studies<sup>a,b</sup>

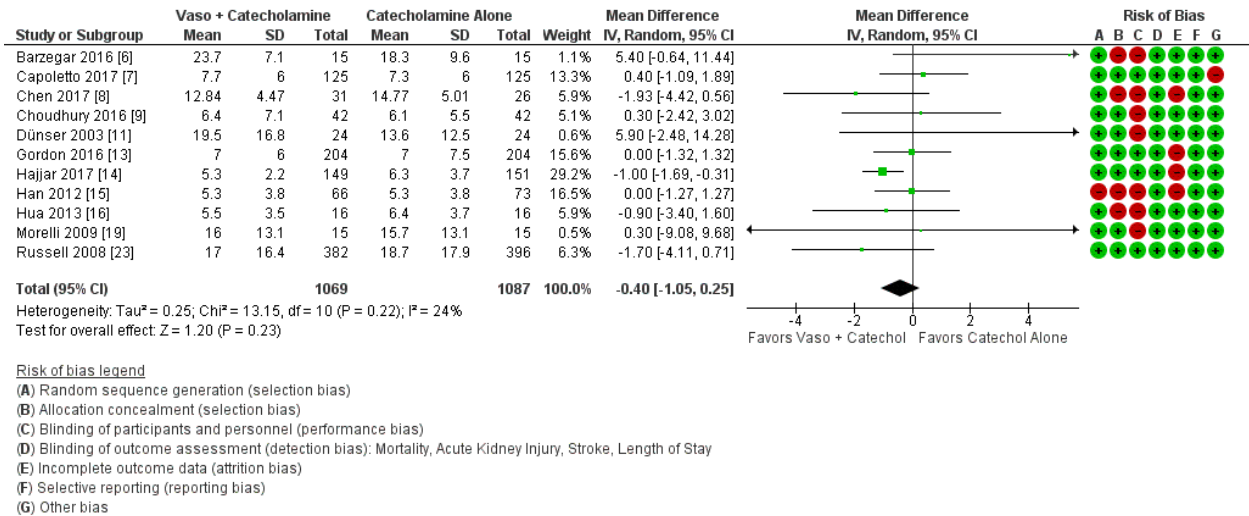

## ICU Length of Stay – Risk of Bias<sup>a,b</sup>

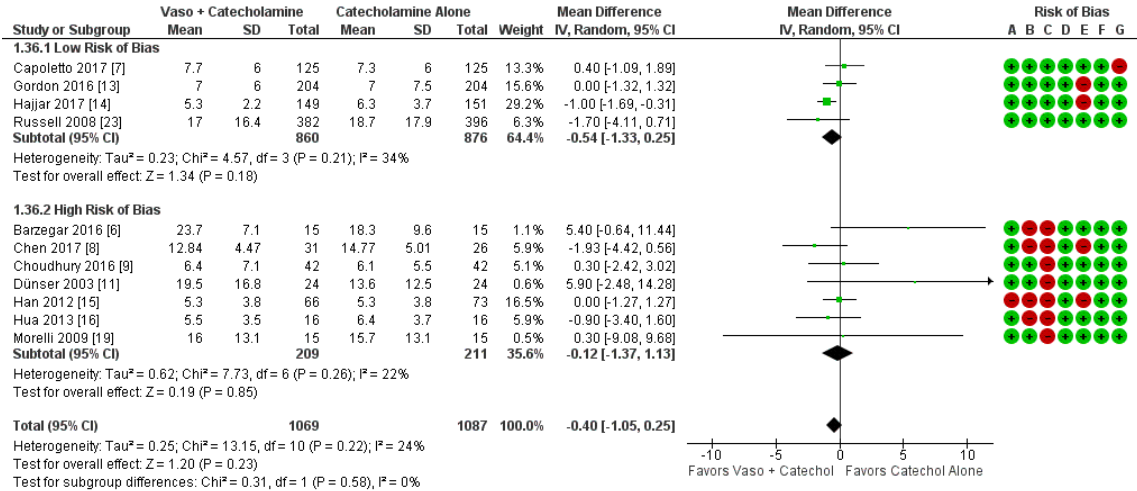

## ICU Length of Stay – Vasopressin versus Analogs<sup>a,b,d</sup>

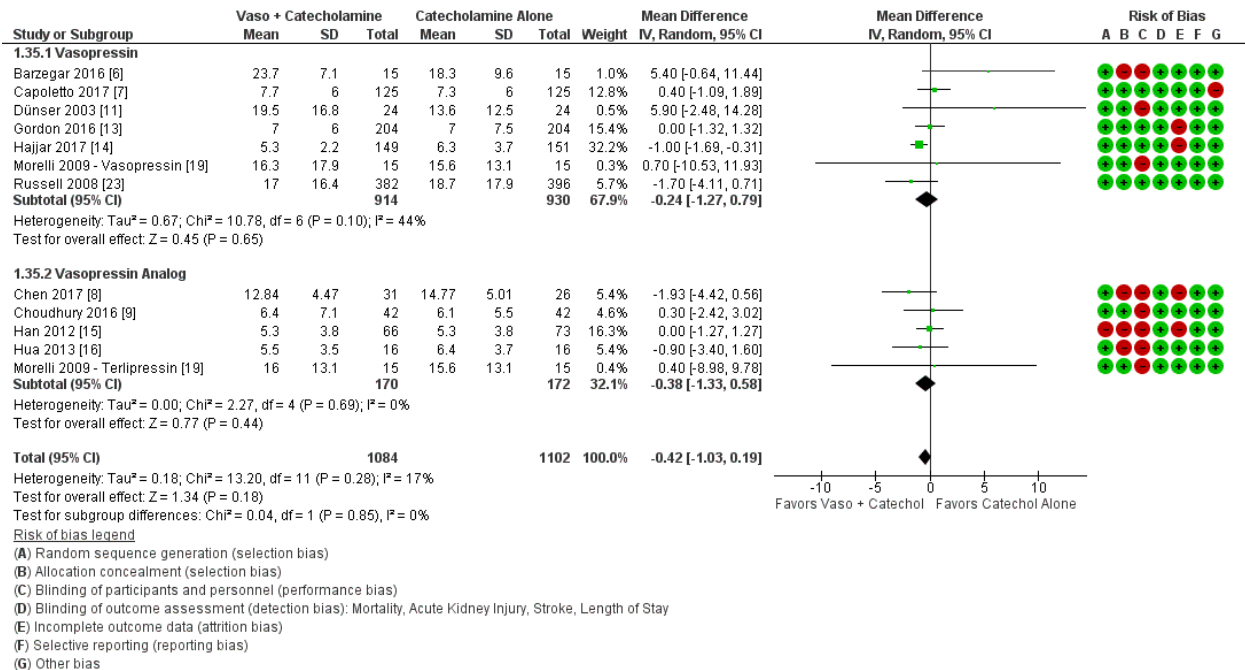

## Footnotes

<sup>a</sup> Vaso + Catecholamine/Vaso + Catechol = Vasopressin (or analog, *i.e.* terlipressin, selepressin or pituitrin) plus Catecholamine Vasopressors

“Events” refers to numbers of patients with events.

<sup>b</sup> The sizes of data markers of the point estimates are proportional to study weight. Green circle with “+” denotes low risk of bias in this domain; red circle with “-” denotes high risk of bias in this domain.

<sup>c</sup> The study “Dünser 2003” included patients with both sepsis and post-cardiac surgery vasoplegia, but subgroup data were obtained for atrial fibrillation only.<sup>11</sup> This paper is excluded from other outcomes when sepsis and post-cardiac surgery vasoplegia are compared.

<sup>d</sup> The study “Morelli 2009” comprised three groups (vasopressin versus terlipressin versus norepinephrine).<sup>19</sup> It was considered as two separate trials (vasopressin versus norepinephrine and terlipressin versus norepinephrine) in the comparison between vasopressin and vasopressin analogs. It was considered as a single trial (vasopressin or terlipressin versus norepinephrine) in all other comparisons.

<sup>e</sup> Added 4 studies that reported on ICU mortality

<sup>f</sup> Full text only refers to studies not published only as abstracts

<sup>g</sup> “Defined as Digital Ischemia” Includes only studies where the authors described the outcome as Digital Ischemia. Peripheral cyanosis and limb ischemia were excluded.



**eAppendix 12 – Funnel Plots for Main Outcome Comparisons**

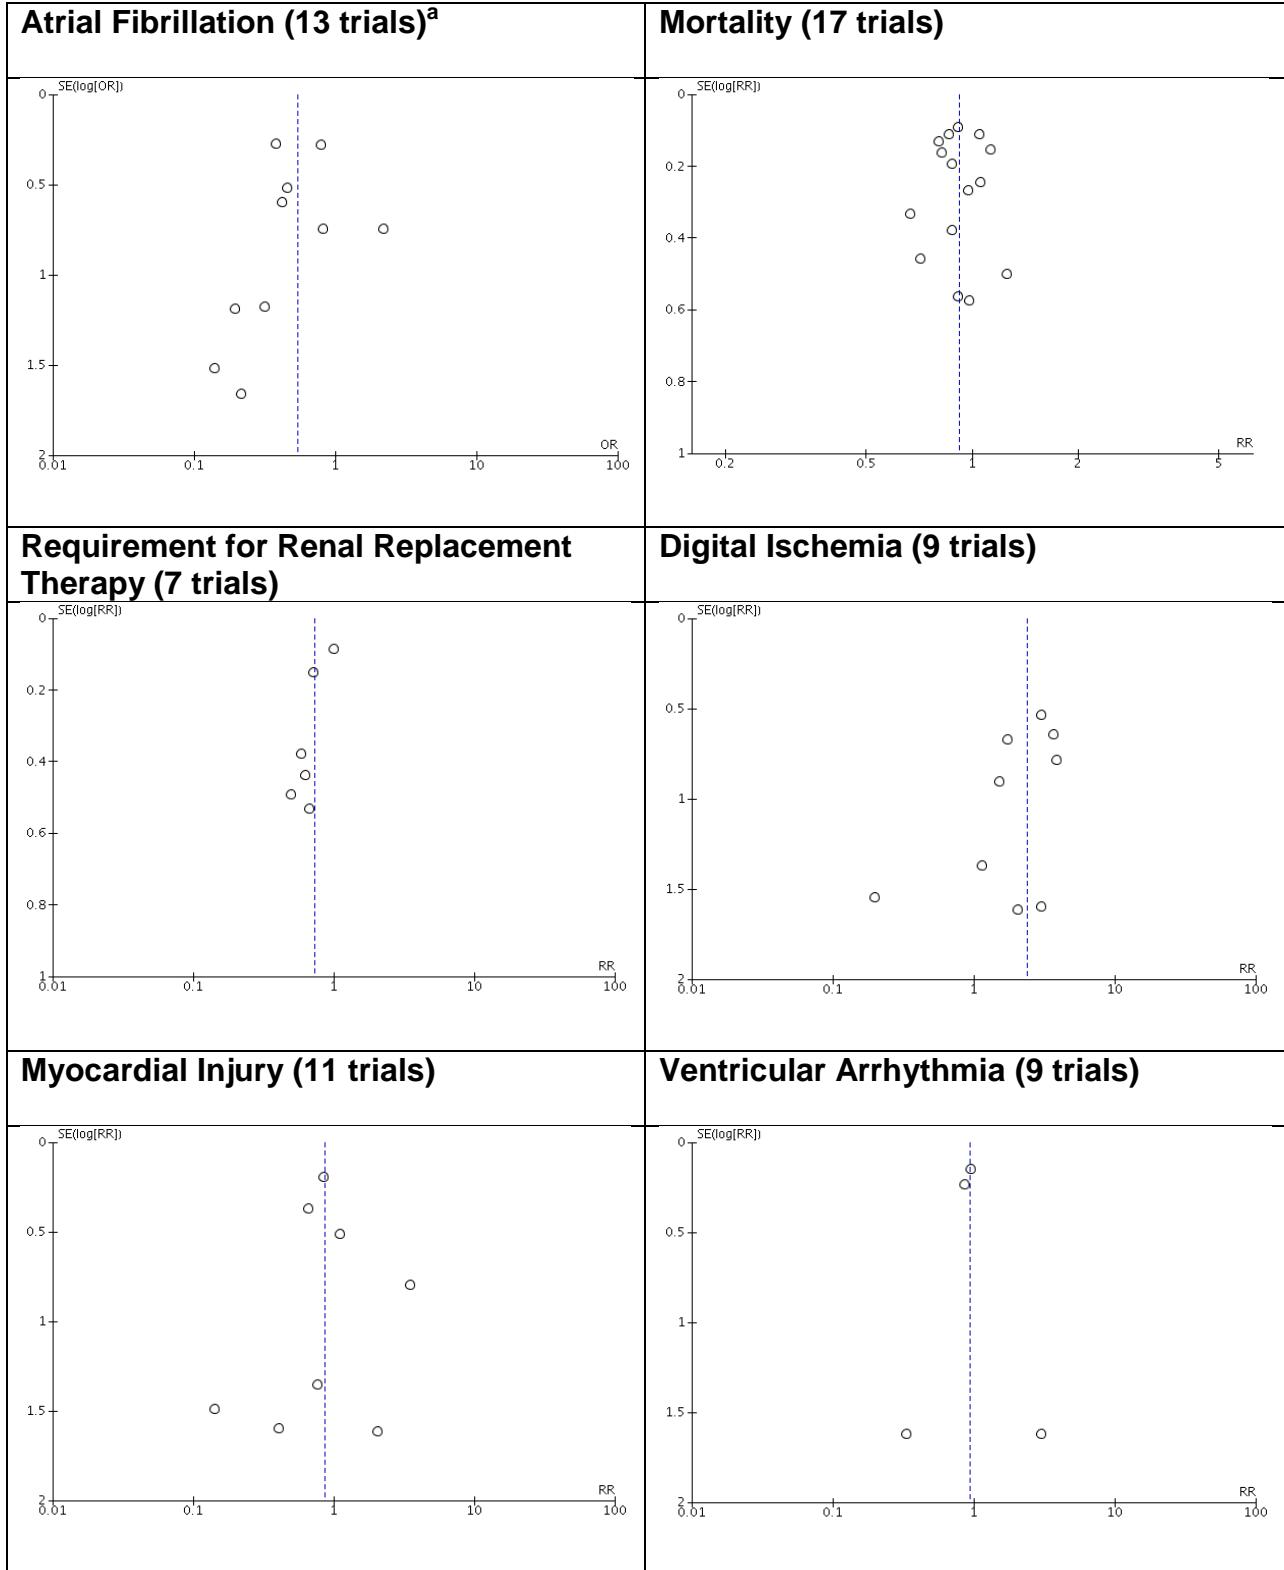

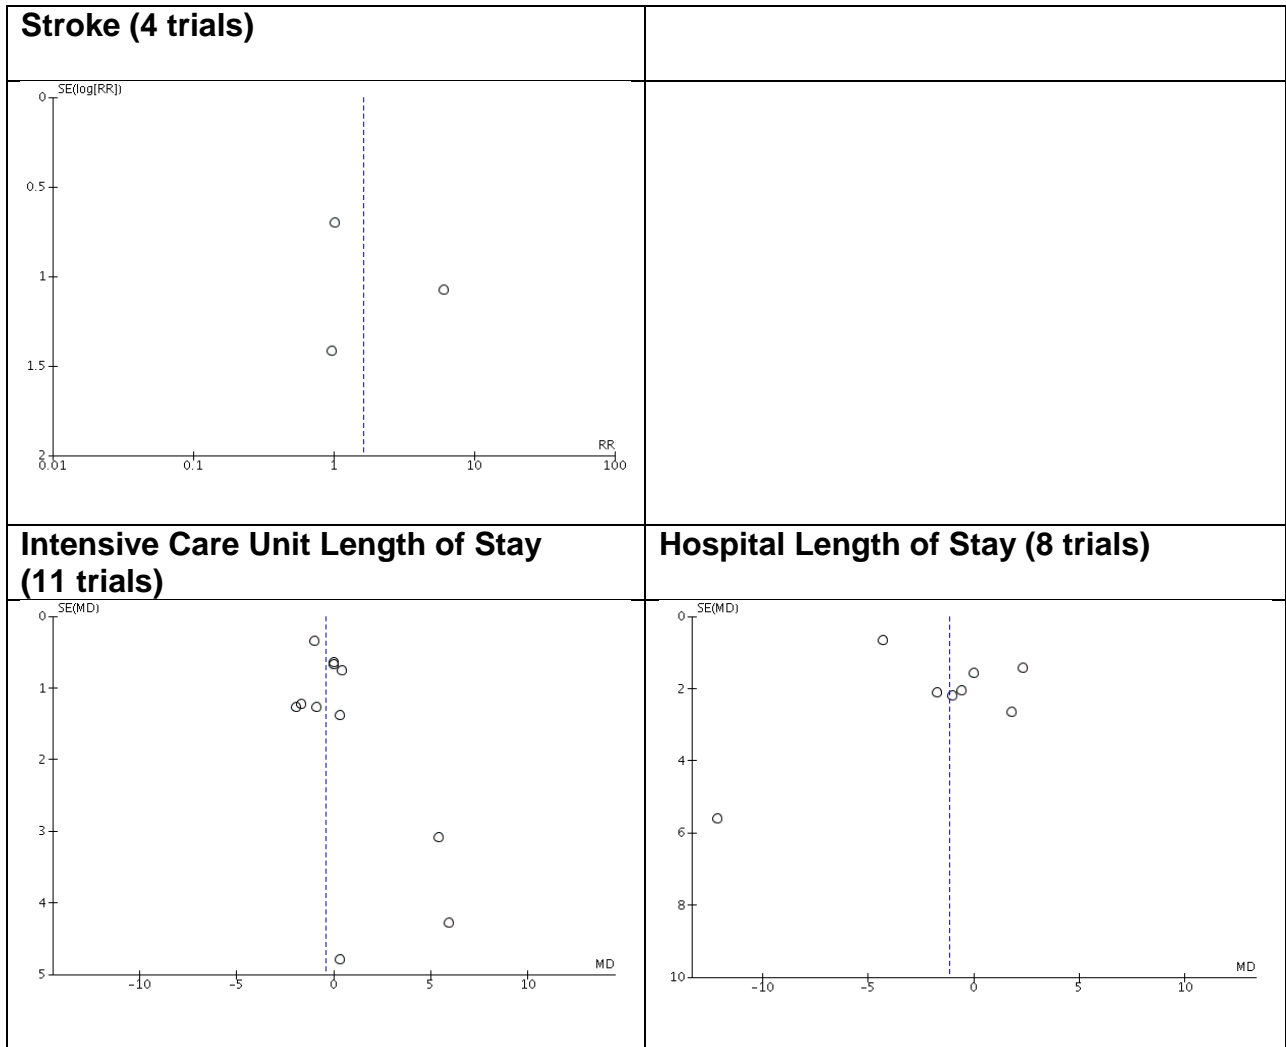

<sup>a</sup>Test for publication bias:

Outcome: Atrial Fibrillation (all studies with at least one outcome event (n=10))

Egger's test: bias = -0.44713 (95% CI = -1.25924 to 0.36498) P = 0.2399

Interpretation: no evidence of publication bias

SE = Standard Error; RR = Risk Ratio; MD = Mean Difference

## eAppendix 13 – Reported lengths of stay in primary studies and transformation of median and interquartile range to mean and standard deviation

### Hospital Length of Stay

| Study and Group            | Vasopressin Plus Catecholamines |        |        |                   |      | Catecholamines Alone |        |           |                   |      |
|----------------------------|---------------------------------|--------|--------|-------------------|------|----------------------|--------|-----------|-------------------|------|
|                            | N                               | Median | IQR    | Mean <sup>a</sup> | SD   | N                    | Median | IQR       | Mean <sup>a</sup> | SD   |
| Capoletto <sup>7</sup>     | 125                             | 12     | 6-22   | 13.3              | 12.0 | 125                  | 12     | 6-22      | 13.3              | 12.0 |
| Chen <sup>8</sup>          | 31                              |        |        | 19.3              | 7.4  | 26                   |        |           | 21.1              | 8.4  |
| Choudhury <sup>9</sup>     | 42                              | 13     | 8-17.5 | 12.8              | 7.3  | 42                   | 10     | 7-14.5    | 10.5              | 5.8  |
| Fonseca Ruiz <sup>12</sup> | 14                              | 13     | 6-21.5 | 13.5              | 12.8 | 16                   | 27.5   | 13.7-35.5 | 25.6              | 17.7 |
| Gordon <sup>13</sup>       | 204                             | 16     | 7-36   | 19.7              | 21.7 | 204                  | 16     | 8-38      | 20.7              | 22.4 |
| Hajjar <sup>14</sup>       | 149                             | 10     | 8-12   | 10                | 3.0  | 151                  | 13     | 10-20     | 14.3              | 7.5  |
| Russell <sup>23</sup>      | 382                             | 27     | 13-52  | 30.7              | 29.0 | 396                  | 26     | 15-53     | 31.3              | 28.3 |

### Intensive Care Unit Length of Stay

| Study and Group        | Vasopressin Plus Catecholamines |        |        |                   |      | Catecholamines Alone |        |        |                   |      |
|------------------------|---------------------------------|--------|--------|-------------------|------|----------------------|--------|--------|-------------------|------|
|                        | N                               | Median | IQR    | Mean <sup>a</sup> | SD   | N                    | Median | IQR    | Mean <sup>a</sup> | SD   |
| Barzegar <sup>6</sup>  | 15                              |        |        | 23.7              | 7.1  | 15                   |        |        | 18.3              | 9.6  |
| Capoletto <sup>7</sup> | 125                             | 7      | 4-12   | 7.7               | 6.0  | 125                  | 6      | 4-12   | 7.3               | 6.0  |
| Chen <sup>8</sup>      | 31                              |        |        | 12.8              | 4.5  | 26                   |        |        | 14.8              | 5.0  |
| Choudhury <sup>9</sup> | 42                              | 6      | 2-11.2 | 6.4               | 7.1  | 42                   | 5      | 3-10.2 | 6.1               | 5.5  |
| Dunser <sup>11</sup>   | 24                              |        |        | 19.5              | 16.8 | 24                   |        |        | 13.6              | 12.5 |
| Gordon <sup>13</sup>   | 204                             | 7      | 3-11   | 7                 | 6.0  | 204                  | 5      | 3-13   | 7                 | 7.5  |
| Hajjar <sup>14</sup>   | 149                             | 5      | 4-7    | 5.3               | 2.2  | 151                  | 6      | 4-9    | 6.3               | 3.7  |
| Han <sup>15</sup>      | 66                              | 5      | 3-8    | 5.3               | 3.8  | 73                   | 5      | 3-8    | 5.3               | 3.8  |
| Hua <sup>16</sup>      | 16                              |        |        | 5.5               | 3.5  | 16                   |        |        | 6.4               | 3.7  |

|                       |     |    |      |      |      |     |    |      |      |      |
|-----------------------|-----|----|------|------|------|-----|----|------|------|------|
| Morelli <sup>19</sup> | 15  | 17 | 5-27 | 16.3 | 18.0 | 15  | 17 | 7-23 | 15.7 | 13.1 |
| Morelli <sup>19</sup> | 15  | 14 | 9-25 | 16   | 13.1 |     |    |      |      |      |
| Russell <sup>23</sup> | 382 | 15 | 7-29 | 17   | 16.4 | 396 | 16 | 8-32 | 18.7 | 17.9 |

IQR = Interquartile Range; N = Total number of patients randomized to treatment group; SD = Standard Deviation

<sup>a</sup>Where studies reporting on length of stay provided only a median and a measure of dispersion, this was converted to mean and standard deviation assuming a normal distribution.<sup>30</sup>

<sup>b</sup> For the three-arm study by Morelli et al, the first row lists the data for participants assigned to vasopressin and the second row lists the data for participants assigned to terlipressin

## eAppendix 14 – Summary of Findings Tables

| Certainty assessment                      |                   |              |               |              |             |                      | Number of patients <sup>a</sup> |                  | Effect                    |                                                          | Certainty | Importance <sup>b</sup> |
|-------------------------------------------|-------------------|--------------|---------------|--------------|-------------|----------------------|---------------------------------|------------------|---------------------------|----------------------------------------------------------|-----------|-------------------------|
| № of studies                              | Study design      | Risk of bias | Inconsistency | Indirectness | Imprecision | Other considerations | Vasopressin                     | Catecholamines   | Relative (95% CI)         | Absolute (95% CI)                                        |           |                         |
| Atrial Fibrillation                       |                   |              |               |              |             |                      |                                 |                  |                           |                                                          |           |                         |
| 13                                        | randomised trials | not serious  | not serious   | not serious  | not serious | none                 | 159/739 (21.5%)                 | 215/723 (29.7%)  | RR 0.77<br>(0.67 to 0.88) | <b>68 fewer per 1,000</b><br>(from 36 fewer to 98 fewer) | HIGH      | IMPORTANT               |
| 28 or 30 Day Mortality                    |                   |              |               |              |             |                      |                                 |                  |                           |                                                          |           |                         |
| 17                                        | randomised trials | very serious | not serious   | not serious  | not serious | none                 | 532/1453 (36.6%)                | 591/1451 (40.7%) | RR 0.89<br>(0.82 to 0.97) | <b>45 fewer per 1,000</b><br>(from 12 fewer to 73 fewer) | LOW       | CRITICAL                |
| Requirement for Renal Replacement Therapy |                   |              |               |              |             |                      |                                 |                  |                           |                                                          |           |                         |
| 6                                         | randomised trials | not serious  | not serious   | not serious  | serious     | none                 | 97/412 (23.5%)                  | 133/393 (33.8%)  | RR 0.74<br>(0.51 to 1.08) | <b>88 fewer per 1,000</b><br>(from 27 more to 166 fewer) | MODERATE  | CRITICAL                |
| Digital Ischemia                          |                   |              |               |              |             |                      |                                 |                  |                           |                                                          |           |                         |
| 9                                         | randomised trials | not serious  | not serious   | not serious  | not serious | Post hoc outcome     | 41/990 (4.1%)                   | 17/973 (1.7%)    | RR 2.38<br>(1.37 to 4.12) | <b>24 more per 1,000</b><br>(from 6 more to 55 more)     | MODERATE  | CRITICAL                |

## Summary of Findings – Continued

| Certainty assessment    |                   |              |                |              |                |                      | Number of patients <sup>a</sup> |                | Effect                           |                                                         | Certainty | Importance <sup>b</sup> |
|-------------------------|-------------------|--------------|----------------|--------------|----------------|----------------------|---------------------------------|----------------|----------------------------------|---------------------------------------------------------|-----------|-------------------------|
| № of studies            | Study design      | Risk of bias | Inconsistency  | Indirectness | Imprecision    | Other considerations | Vasopressin                     | Catecholamines | Relative (95% CI)                | Absolute (95% CI)                                       |           |                         |
| Myocardial Injury       |                   |              |                |              |                |                      |                                 |                |                                  |                                                         |           |                         |
| 10                      | randomised trials | not serious  | not serious    | serious      | serious        | none                 | 62/991 (6.3%)                   | 71/966 (7.3%)  | <b>RR 0.86</b><br>(0.63 to 1.17) | <b>10 fewer per 1,000</b><br>(from 12 more to 27 fewer) | LOW       | CRITICAL                |
| Ventricular Arrhythmia  |                   |              |                |              |                |                      |                                 |                |                                  |                                                         |           |                         |
| 9                       | randomised trials | not serious  | not serious    | serious      | serious        | none                 | 39/418 (9.3%)                   | 48/419 (11.5%) | <b>RR 0.93</b><br>(0.73 to 1.19) | <b>8 fewer per 1,000</b><br>(from 22 more to 31 fewer)  | LOW       | IMPORTANT               |
| Stroke                  |                   |              |                |              |                |                      |                                 |                |                                  |                                                         |           |                         |
| 4                       | randomised trials | not serious  | not serious    | not serious  | serious        | none                 | 11/683 (1.6%)                   | 6/675 (0.9%)   | <b>RR 1.61</b><br>(0.53 to 4.95) | <b>5 more per 1,000</b><br>(from 4 fewer to 35 more)    | MODERATE  | CRITICAL                |
| Hospital Length of Stay |                   |              |                |              |                |                      |                                 |                |                                  |                                                         |           |                         |
| 7                       | randomised trials | not serious  | <b>serious</b> | not serious  | <b>serious</b> | none                 | 963                             | 976            | -                                | <b>MD 1.1 lower</b><br>(3.9 lower to 1.7 higher)        | LOW       | IMPORTANT               |
| ICU Length of Stay      |                   |              |                |              |                |                      |                                 |                |                                  |                                                         |           |                         |
| 11                      | randomised trials | not serious  | not serious    | not serious  | <b>serious</b> | none                 | 1069                            | 1087           | -                                | <b>MD 0.4 lower</b><br>(1.05 lower to 0.25 higher)      | MODERATE  | CRITICAL                |

**CI:** Confidence interval; **RR:** Risk ratio; **MD:** Mean difference

<sup>a</sup> For binary outcomes, the numerator refers to the number of patients with the event across all studies and the denominator refers to the number of patients at risk of the event across all studies. For continuous outcomes (i.e. length of stay), the number provided is the number of patients with available data for that outcome.

<sup>b</sup> Outcome importance is based upon the GRADE framework and is based on the polling in Appendix 5

## eReferences for Appendices

1. Marshall JC, Vincent J-L, Guyatt G, et al. Outcome measures for clinical research in sepsis: A report of the 2nd Cambridge Colloquium of the International Sepsis Forum. *Crit Care Med.* 2005;33(8):1708-1716.
2. Angus DC, Carlet J, Brussels Roundtable P. Surviving intensive care: a report from the 2002 Brussels Roundtable. *Intensive Care Med.* 2003;29(3):368-377.
3. Abdullah MH, Saleh SM, Morad WS. Terlipressin versus norepinephrine to counteract intraoperative paracentesis induced refractory hypotension in cirrhotic patients. *Egyptian Journal of Anaesthesia.* 2012;28(1):29-35.
4. Acevedo JG, Fernandez J, Escorsell A, Mas A, Gines P, Arroyo V. Clinical efficacy and safety of terlipressin administration in cirrhotic patients with septic shock. *Journal of Hepatology.* 2009;50:S73.
5. Albanese J, Leone M, Delmas A, Martin C. Terlipressin or norepinephrine in hyperdynamic septic shock: A prospective, randomized study. *Crit Care Med.* 2005;33(9):1897-1902.
6. Barzegar E, Ahmadi A, Mousavi S, Nouri M, Mojtahedzadeh M. The Therapeutic Role of Vasopressin on Improving Lactate Clearance During and After Vasogenic Shock: Microcirculation, Is It The Black Box? *Acta medica Iranica.* 2016;54(1):15-23.  
<http://onlinelibrary.wiley.com/o/cochrane/clcentral/articles/800/CN-01133800/frame.html>.
7. Capoletto C, Almeida J, Ferreira G, et al. Vasopressin versus norepinephrine for the management of septic shock in cancer patients (vancs II). *Critical Care Conference: 37th International Symposium on Intensive Care and Emergency Medicine Belgium.* 2017;21(1 Supplement 1).
8. Chen Z, Zhou P, Lu Y, Yang C. [Comparison of effect of norepinephrine and terlipressin on patients with ARDS combined with septic shock: a prospective single-blind randomized controlled trial]. *Zhonghua Wei Zhong Bing Ji Jiu Yi Xue.* 2017;29(2):111-116.
9. Choudhury A, Kedarisetty CK, Vashishtha C, et al. A randomized trial comparing terlipressin and noradrenaline in patients with cirrhosis and septic shock. *Liver International.* 2016:16.
10. Clem O, Painter J, Cullen J, et al. Norepinephrine and vasopressin vs norepinephrine alone for septic shock: Randomized controlled trial. *Crit Care Med.* 2016;44 (12 Supplement 1):413.
11. Dünser MW, Mayr AJ, Ulmer H, et al. Arginine vasopressin in advanced vasodilatory shock: a prospective, randomized, controlled study. *Circulation.* 2003;107(18):2313-2319.
12. Fonseca-Ruiz NJ, Cano AsL, Carmona DPO, et al. Uso de vasopresina en pacientes con choque séptico refractario a catecolaminas. Estudio piloto. *Acta Colombiana de Cuidado Intensivo* 2013;13(2):114-123.
13. Gordon AC, Mason AJ, Thirunavukkarasu N, et al. Effect of early vasopressin vs norepinephrine on kidney failure in patients with septic shock: The vanish randomized clinical trial. *JAMA.* 2016;316(5):509-518.

14. Hajjar LA, Vincent JL, Barbosa Gomes Galas FR, et al. Vasopressin versus Norepinephrine in Patients with Vasoplegic Shock after Cardiac SurgeryThe VANCS Randomized Controlled Trial. *Anesthesiology*. 2017;126(1):85-93.
15. Han X-d, Sun H, Huang X-y, et al. [A clinical study of pituitrin versus norepinephrine in the treatment of patients with septic shock]. *Zhongguo Wei Zhong Bing Ji Jiu Yi Xue*. 2012;24(1):33-37.
16. Hua F, Wang X, Zhu L. Terlipressin decreases vascular endothelial growth factor expression and improves oxygenation in patients with acute respiratory distress syndrome and shock. *J Emerg Med*. 2013;44(2):434-439.  
<http://onlinelibrary.wiley.com/o/cochrane/clcentral/articles/169/CN-00879169/frame.html>.
17. Lauzier F, Levy B, Lamarre P, Lesur O. Vasopressin or norepinephrine in early hyperdynamic septic shock: a randomized clinical trial. *Intensive Care Med*. 2006;32(11):1782-1789.
18. Malay MB, Ashton RC, Jr., Landry DW, Townsend RN. Low-dose vasopressin in the treatment of vasodilatory septic shock. *Journal of Trauma-Injury Infection & Critical Care*. 1999;47(4):699-703; discussion 703-695.
19. Morelli A, Ertmer C, Rehberg S, et al. Continuous terlipressin versus vasopressin infusion in septic shock (TERLIVAP): a randomized, controlled pilot study. *Crit Care*. 2009;13(4):R130.
20. Oliveira S, Dessa F, Rocha C, Oliveira F. Early vasopressin application in shock study. *Critical Care*. 2014;18:S56.
21. Patel BM, Chittock DR, Russell JA, Walley KR. Beneficial effects of short-term vasopressin infusion during severe septic shock. *Anesthesiology*. 2002;96.
22. Prakash V, Choudhury AK, Sarin SK. Early introduction of a combination of low dose terlipressin and noradrenaline as vasopressors is superior to high dose noradrenaline alone in patients of cirrhosis with septic shock(NCT02468063). *Hepatology*. 2017;66 (Supplement 1):138A.
23. Russell JA, Walley KR, Singer J, et al. Vasopressin versus Norepinephrine Infusion in Patients with Septic Shock. *N Engl J Med*. 2008;358(9):877-887.
24. Russell JA, Vincent JL, Kjolbye AL, et al. Selepressin, a novel selective vasopressin V1A agonist, is an effective substitute for norepinephrine in a phase IIa randomized, placebo-controlled trial in septic shock patients. *Crit Care*. 2017;21(1):213.
25. Svoboda P, Scheer P, Kantorova I, et al. Terlipressin in the treatment of late phase catecholamine-resistant septic shock. *Hepato-Gastroenterology*. 2012;59(116):1043-1047.
26. Argenziano M, Choudhri AF, Oz MC, Rose EA, Smith CR, Landry DW. A prospective randomized trial of arginine vasopressin in the treatment of vasodilatory shock after left ventricular assist device placement. *Circulation*. 96(9 Suppl):II-286-290.
27. Elmenesy T, Nassar Y. A randomized double-blind comparative study between short-term norepinephrine and vasopressin infusion in septic shock. *Egyptian Journal of Anaesthesia*. 2008;24(4):355-362.
28. Luckner G, Dünser MW, Stadlbauer K-H, et al. Cutaneous vascular reactivity and flow motion response to vasopressin in advanced vasodilatory shock and severe postoperative multiple organ dysfunction syndrome. *Critical Care*. 2006;10(2):R40-R40.



29. Morelli A, Donati A, Ertmer C, et al. Effects of vasopressinergic receptor agonists on sublingual microcirculation in norepinephrine-dependent septic shock. *Crit Care*. 2011;15(5):R217.
30. Wan X, Wang W, Liu J, Tong T. Estimating the sample mean and standard deviation from the sample size, median, range and/or interquartile range. *BMC Medical Research Methodology*. 2014;14(1):135.
